# Supplementary material for: Texture Detection of Aluminum Foil Based on Top‐Hat Transformation and Connected Region Segmentation
Source: Hindawi journal article supplement (doi:10.1155/2020/2028407), 2020-01-01
Supplement: f1 [file 2028407.f1.zip]

Archive with 16 entries (16 files):
- 88-1.bmp
- 88-2.bmp
- 88-3.bmp
- 88-4.bmp
- 92-1.bmp
- 92-2.bmp
- 92-3.bmp
- 92-4.bmp
- 95-1.bmp
- 95-2.bmp
- 95-3.bmp
- 95-4.bmp
- 97-1.bmp
- 97-2.bmp
- 97-3.bmp
- 97-4.bmp
