# Supplementary figures and images for: Texture Detection of Aluminum Foil Based on Top‐Hat Transformation and Connected Region Segmentation
Source: Hindawi journal article supplement (doi:10.1155/2020/2028407), 2020-01-01

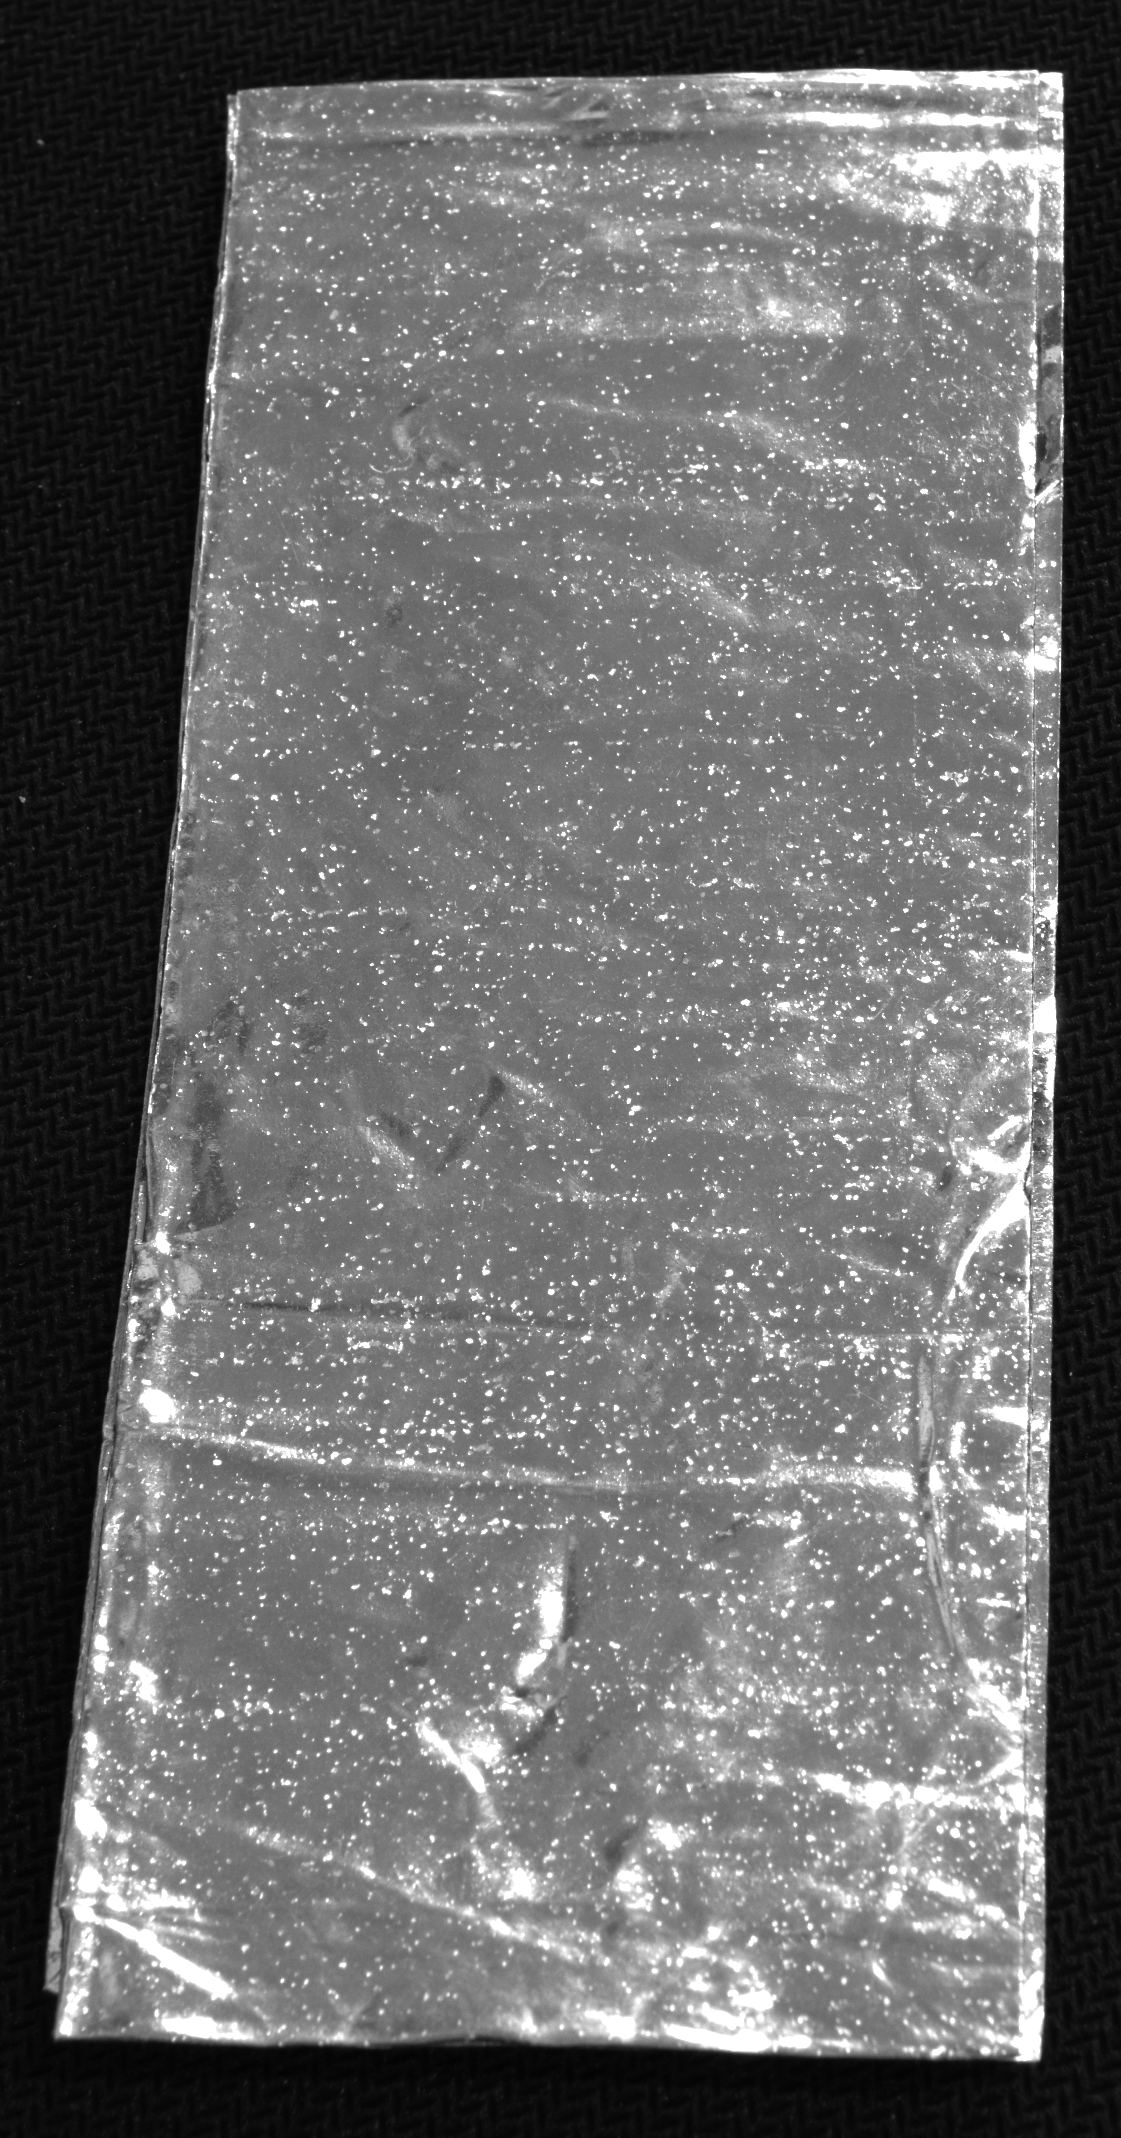

Supplement: f1 [file 2028407.f1.zip › 88-1.bmp]

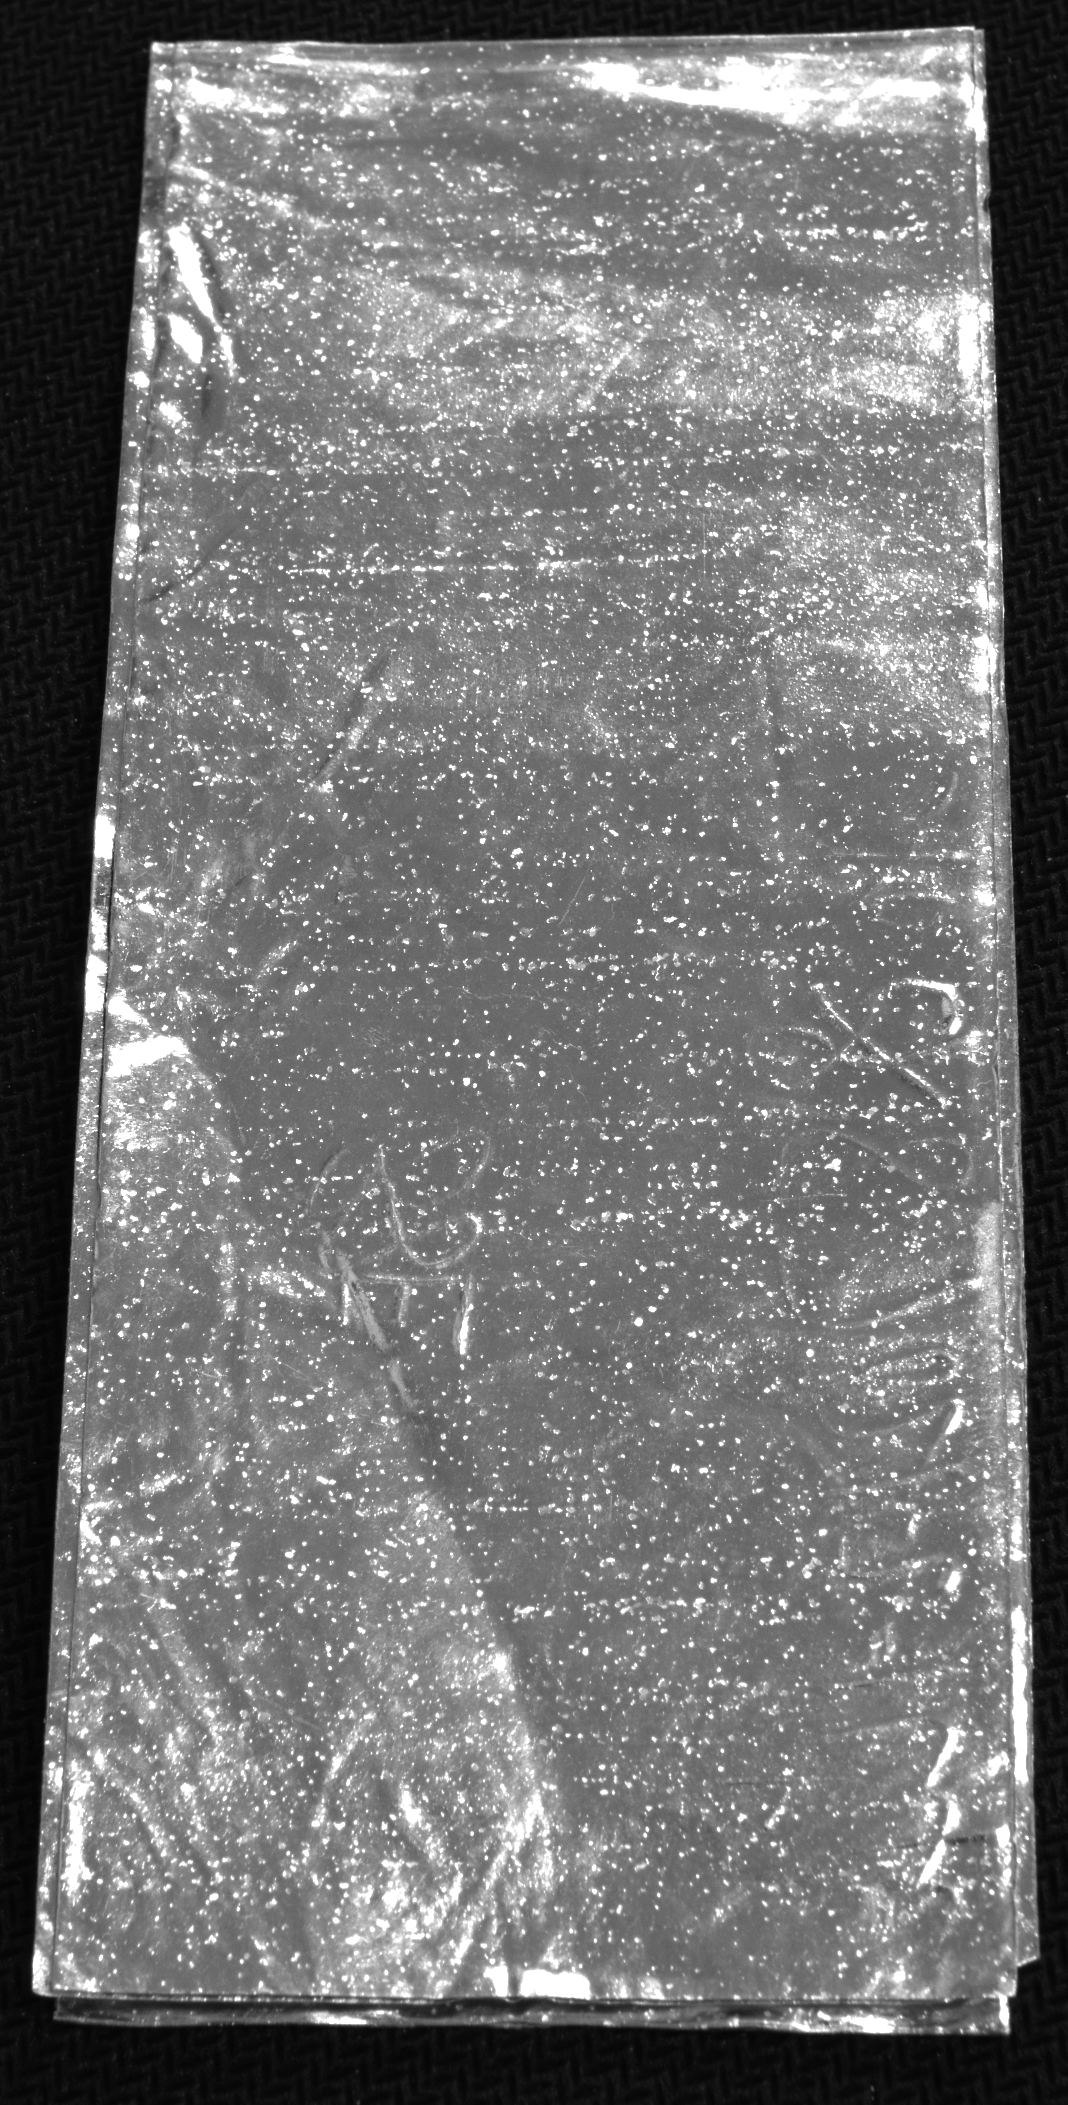

Supplement: f1 [file 2028407.f1.zip › 88-2.bmp]

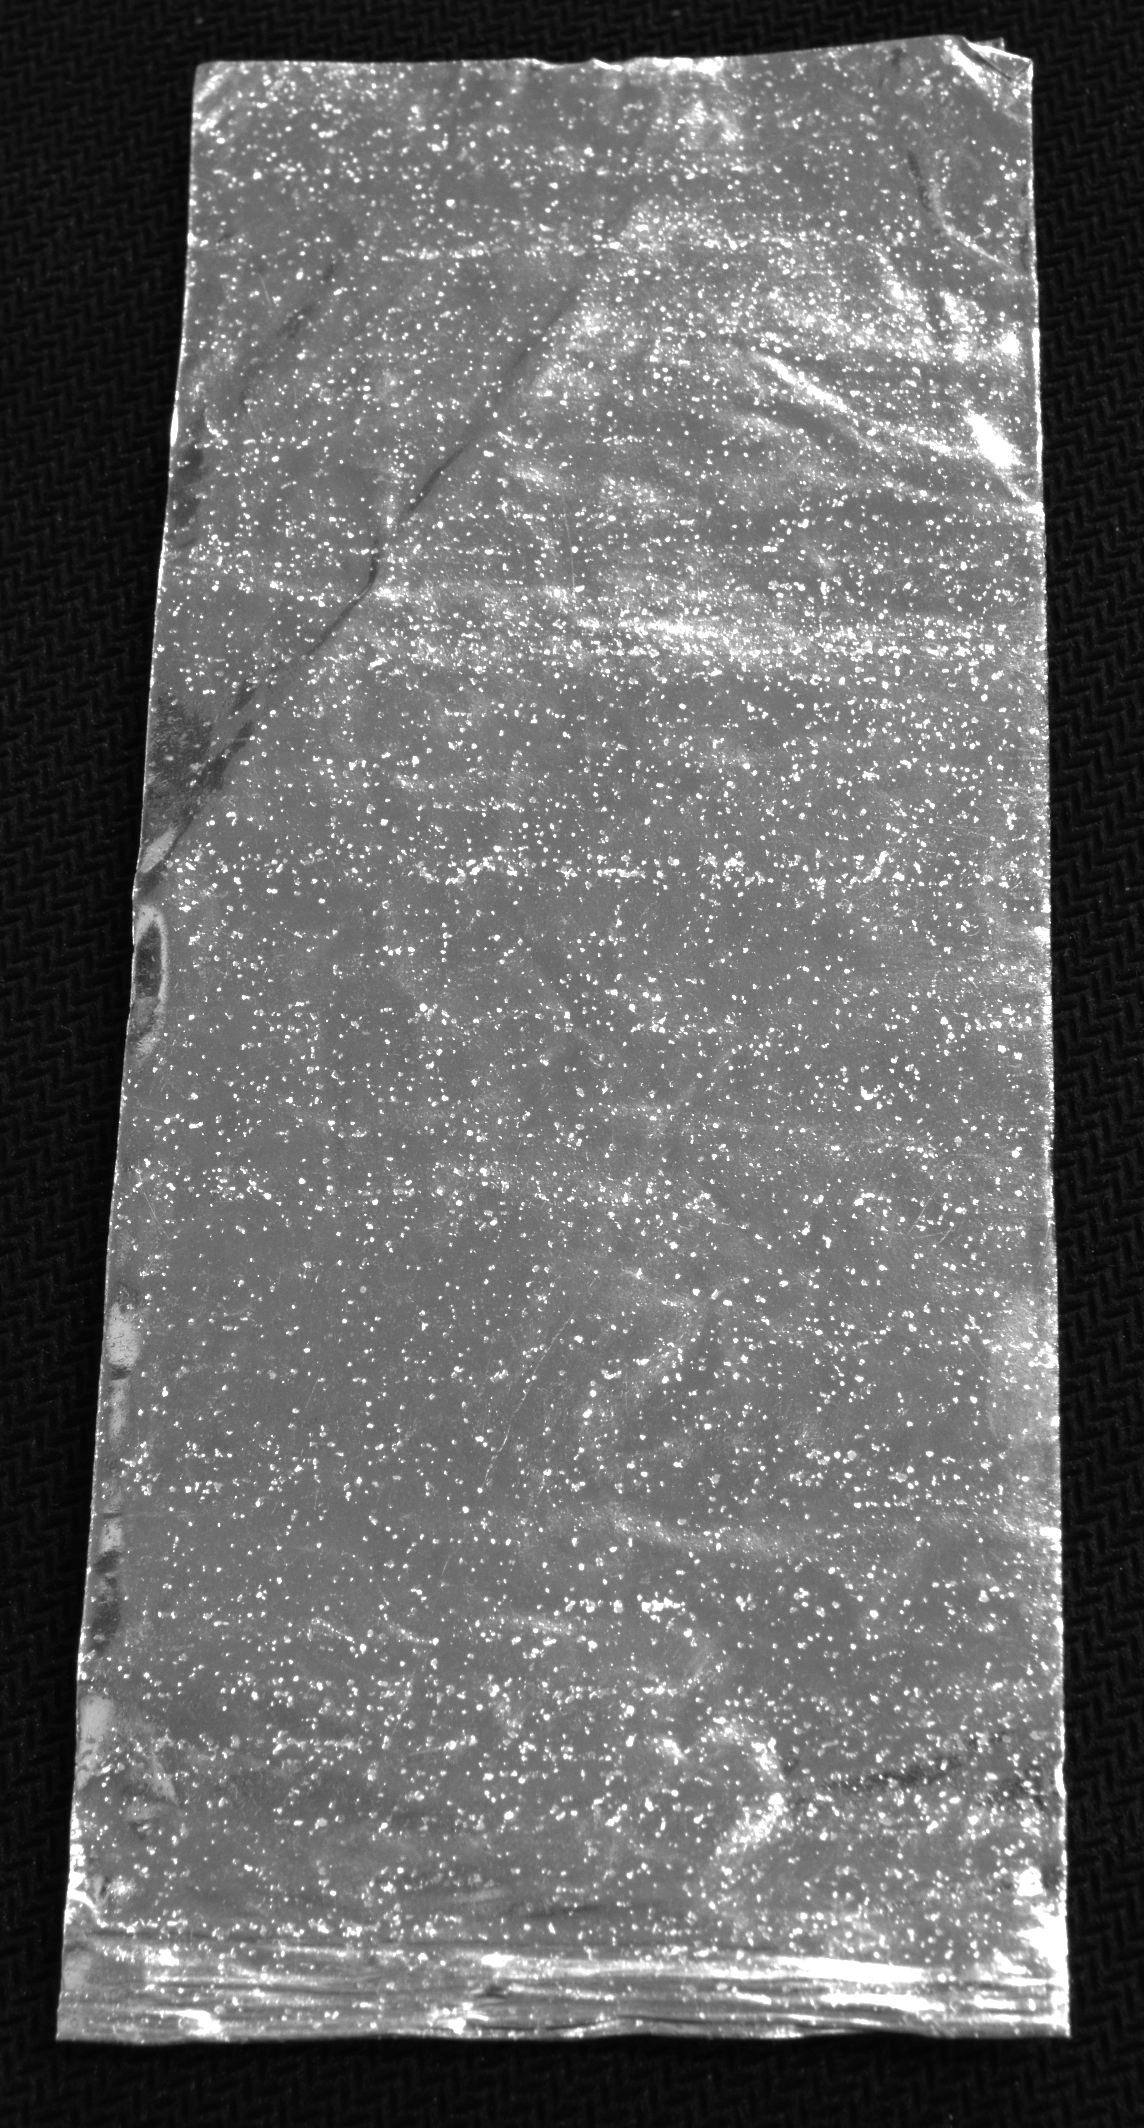

Supplement: f1 [file 2028407.f1.zip › 88-3.bmp]

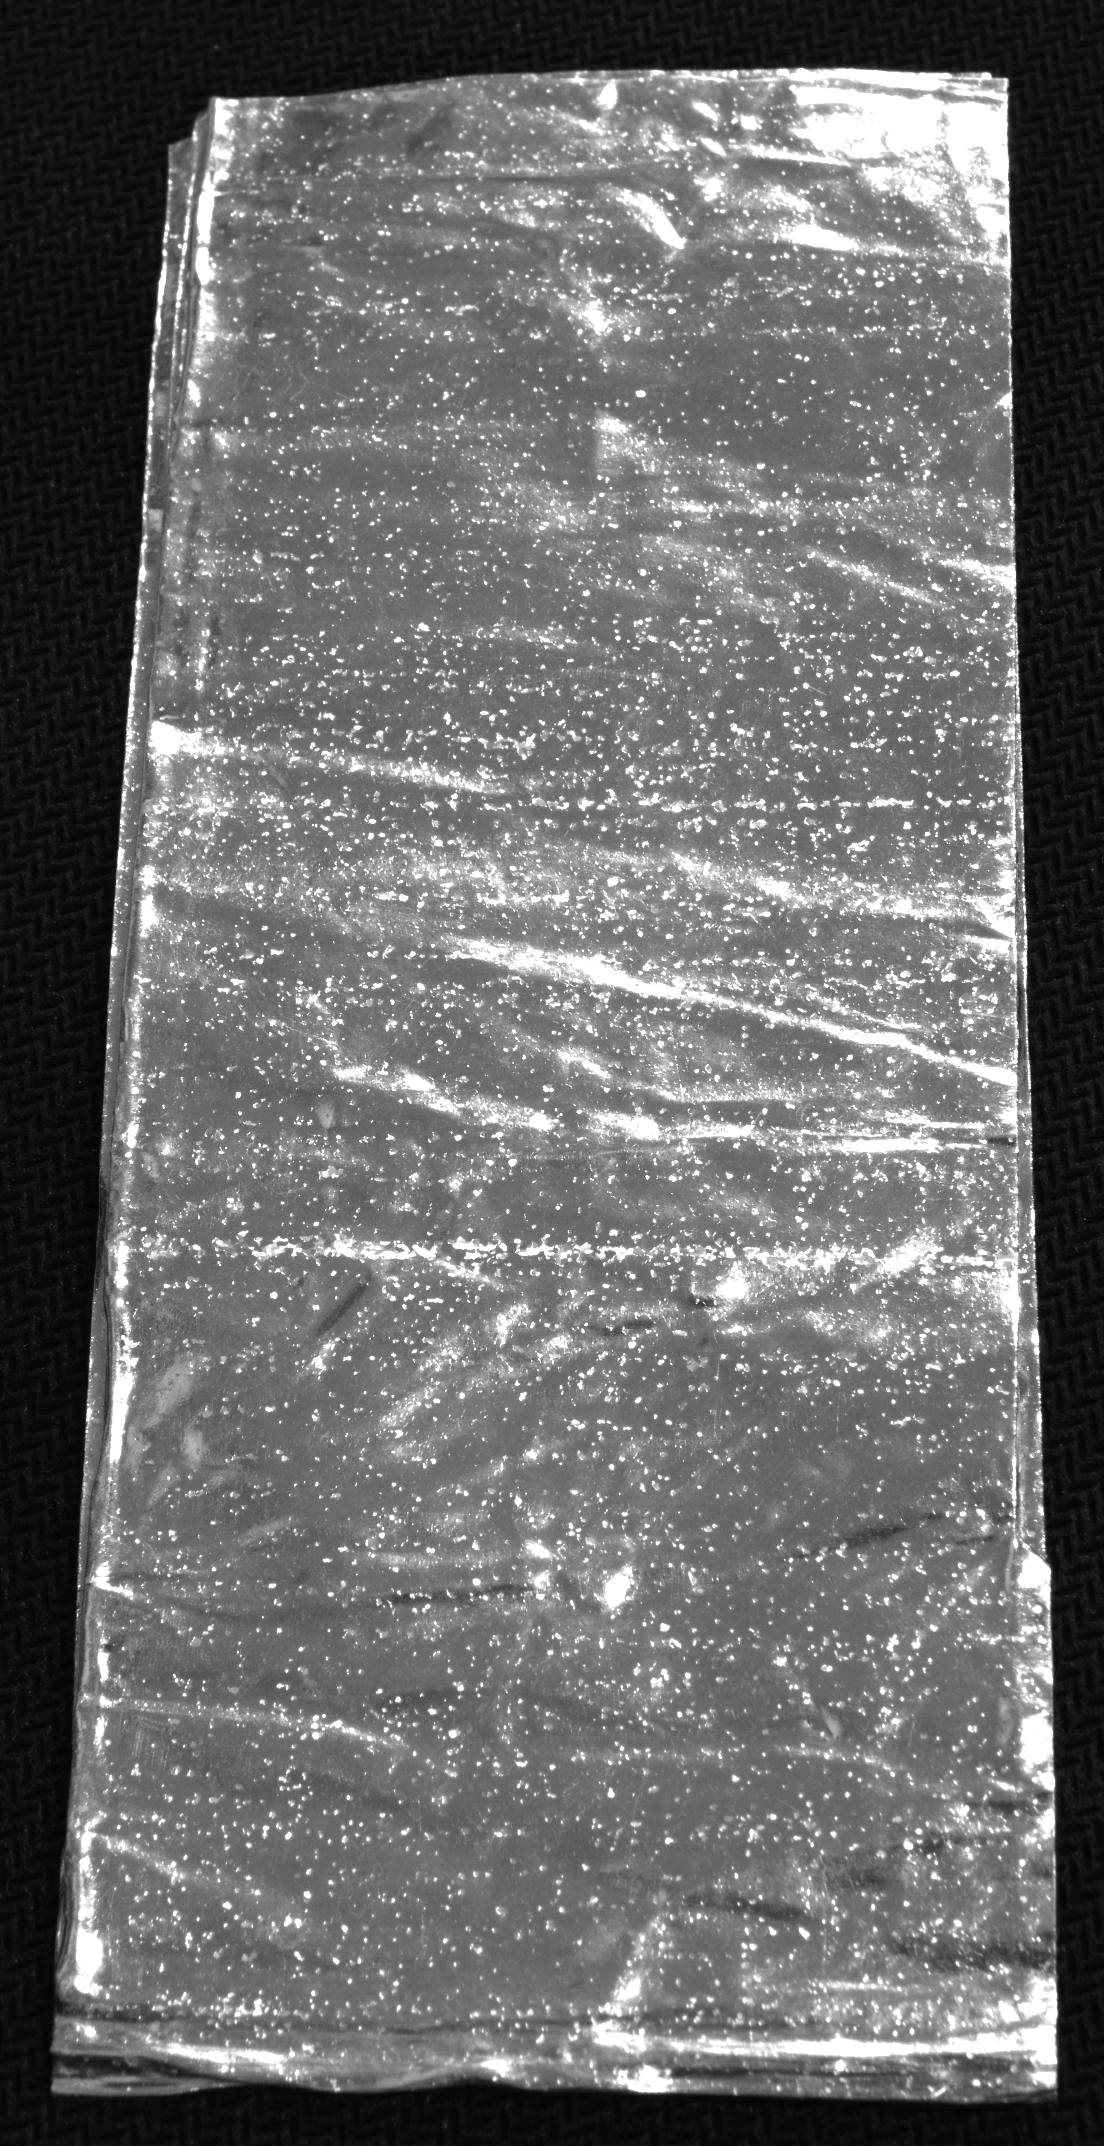

Supplement: f1 [file 2028407.f1.zip › 88-4.bmp]

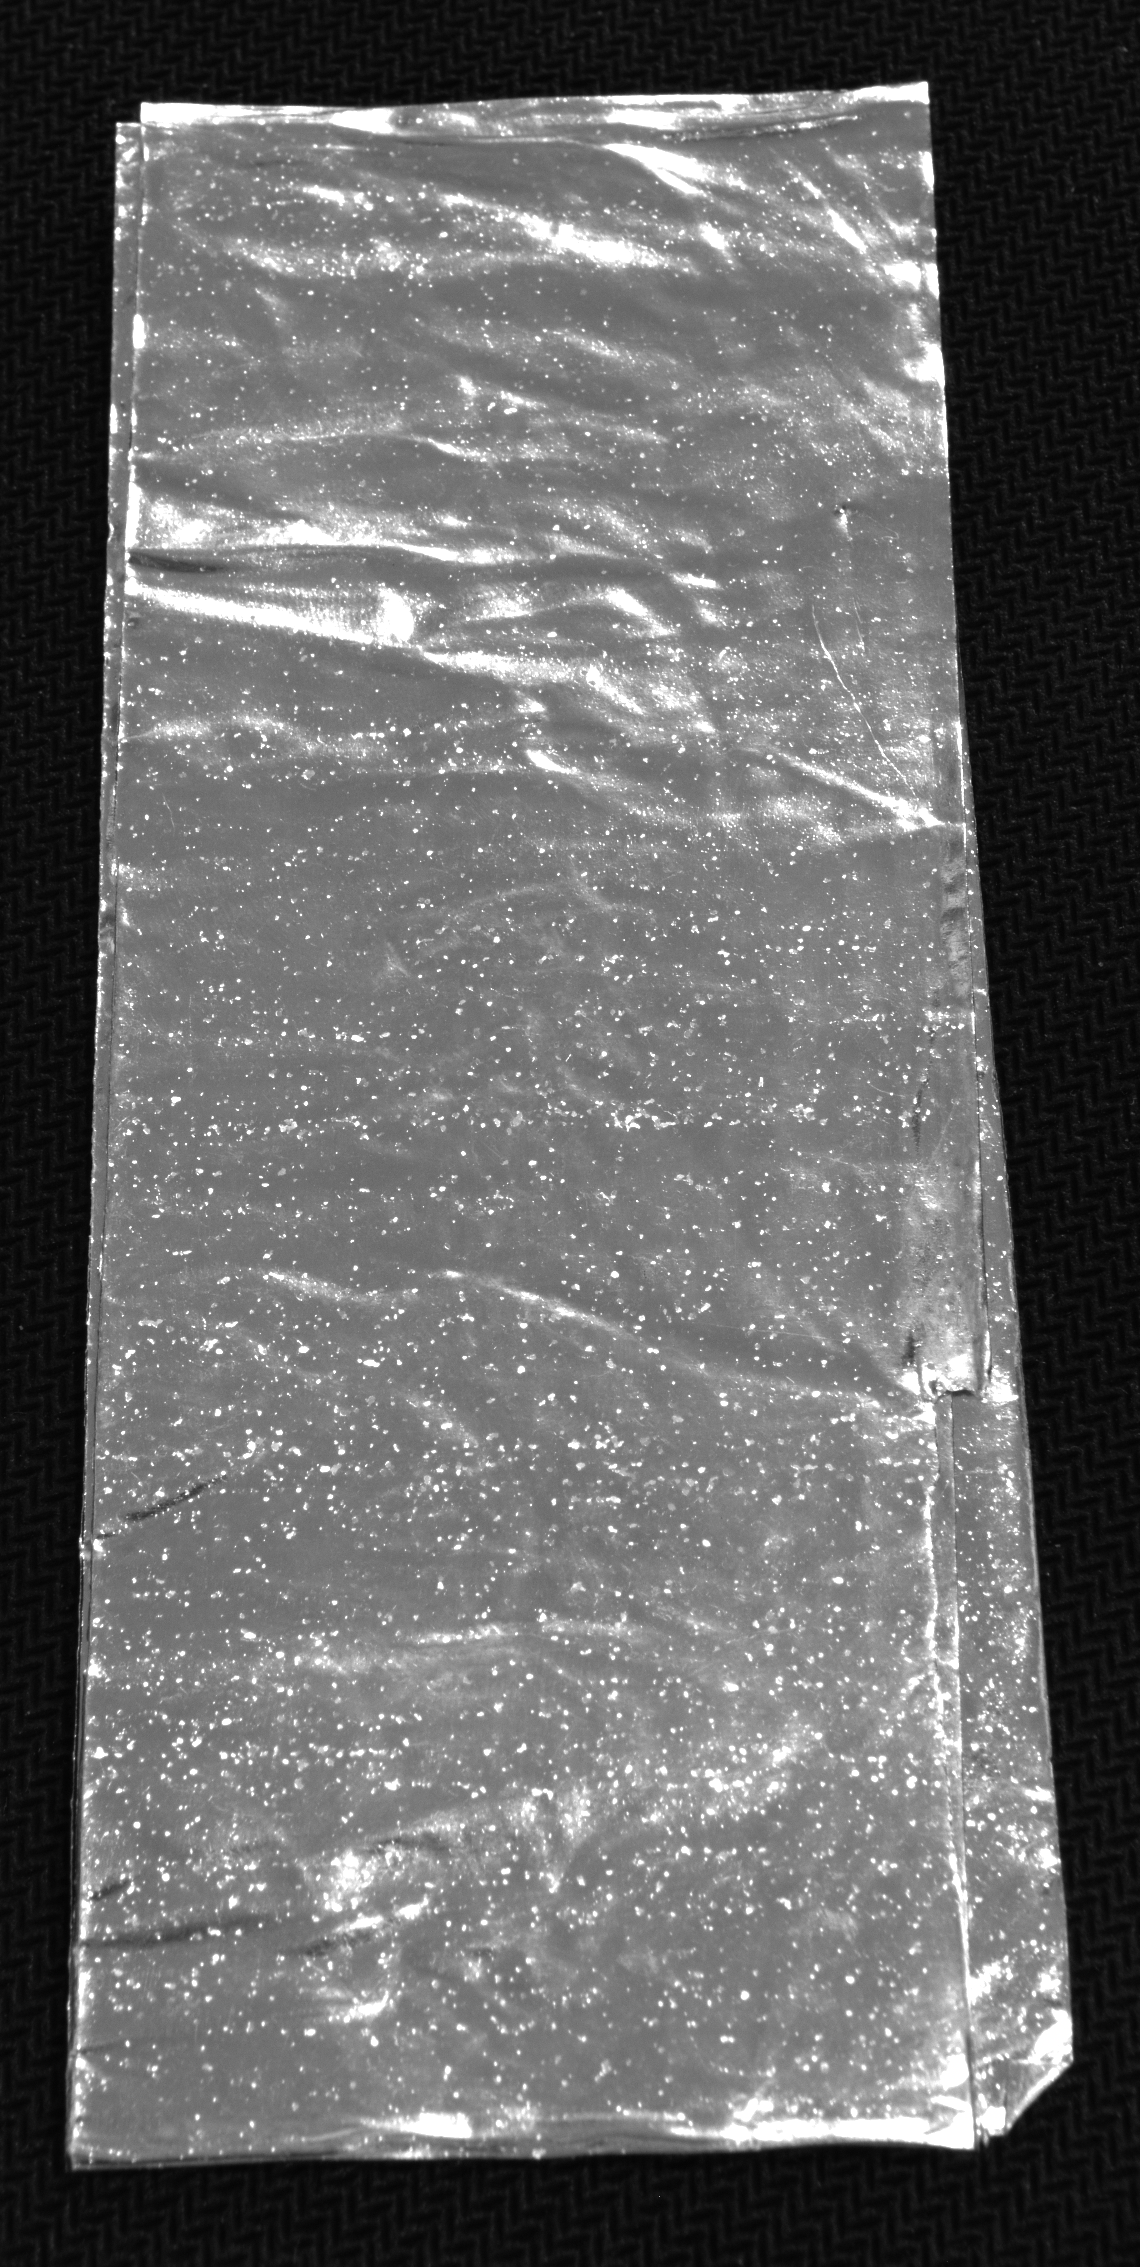

Supplement: f1 [file 2028407.f1.zip › 92-1.bmp]

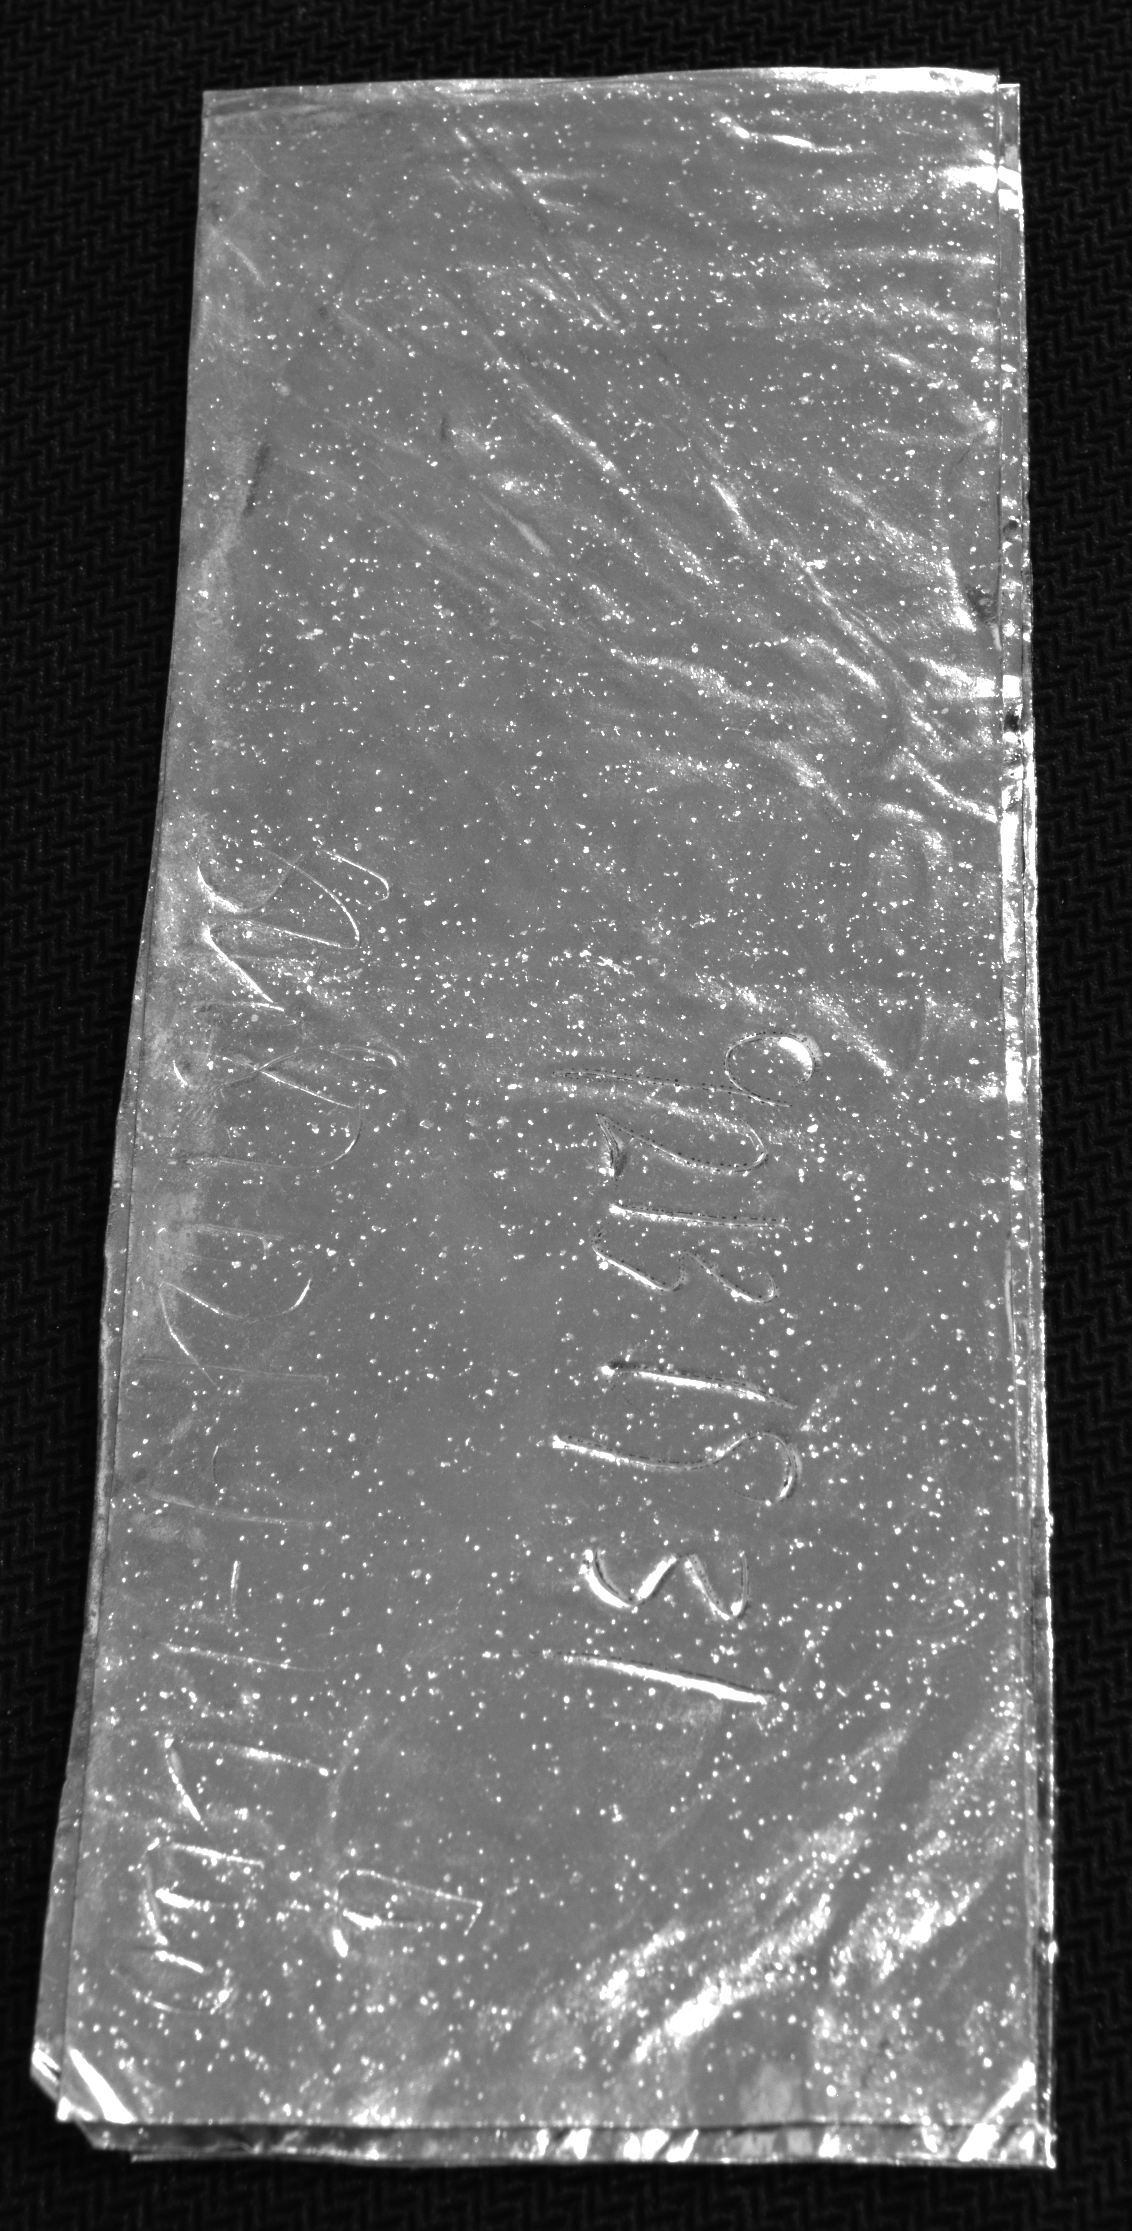

Supplement: f1 [file 2028407.f1.zip › 92-2.bmp]

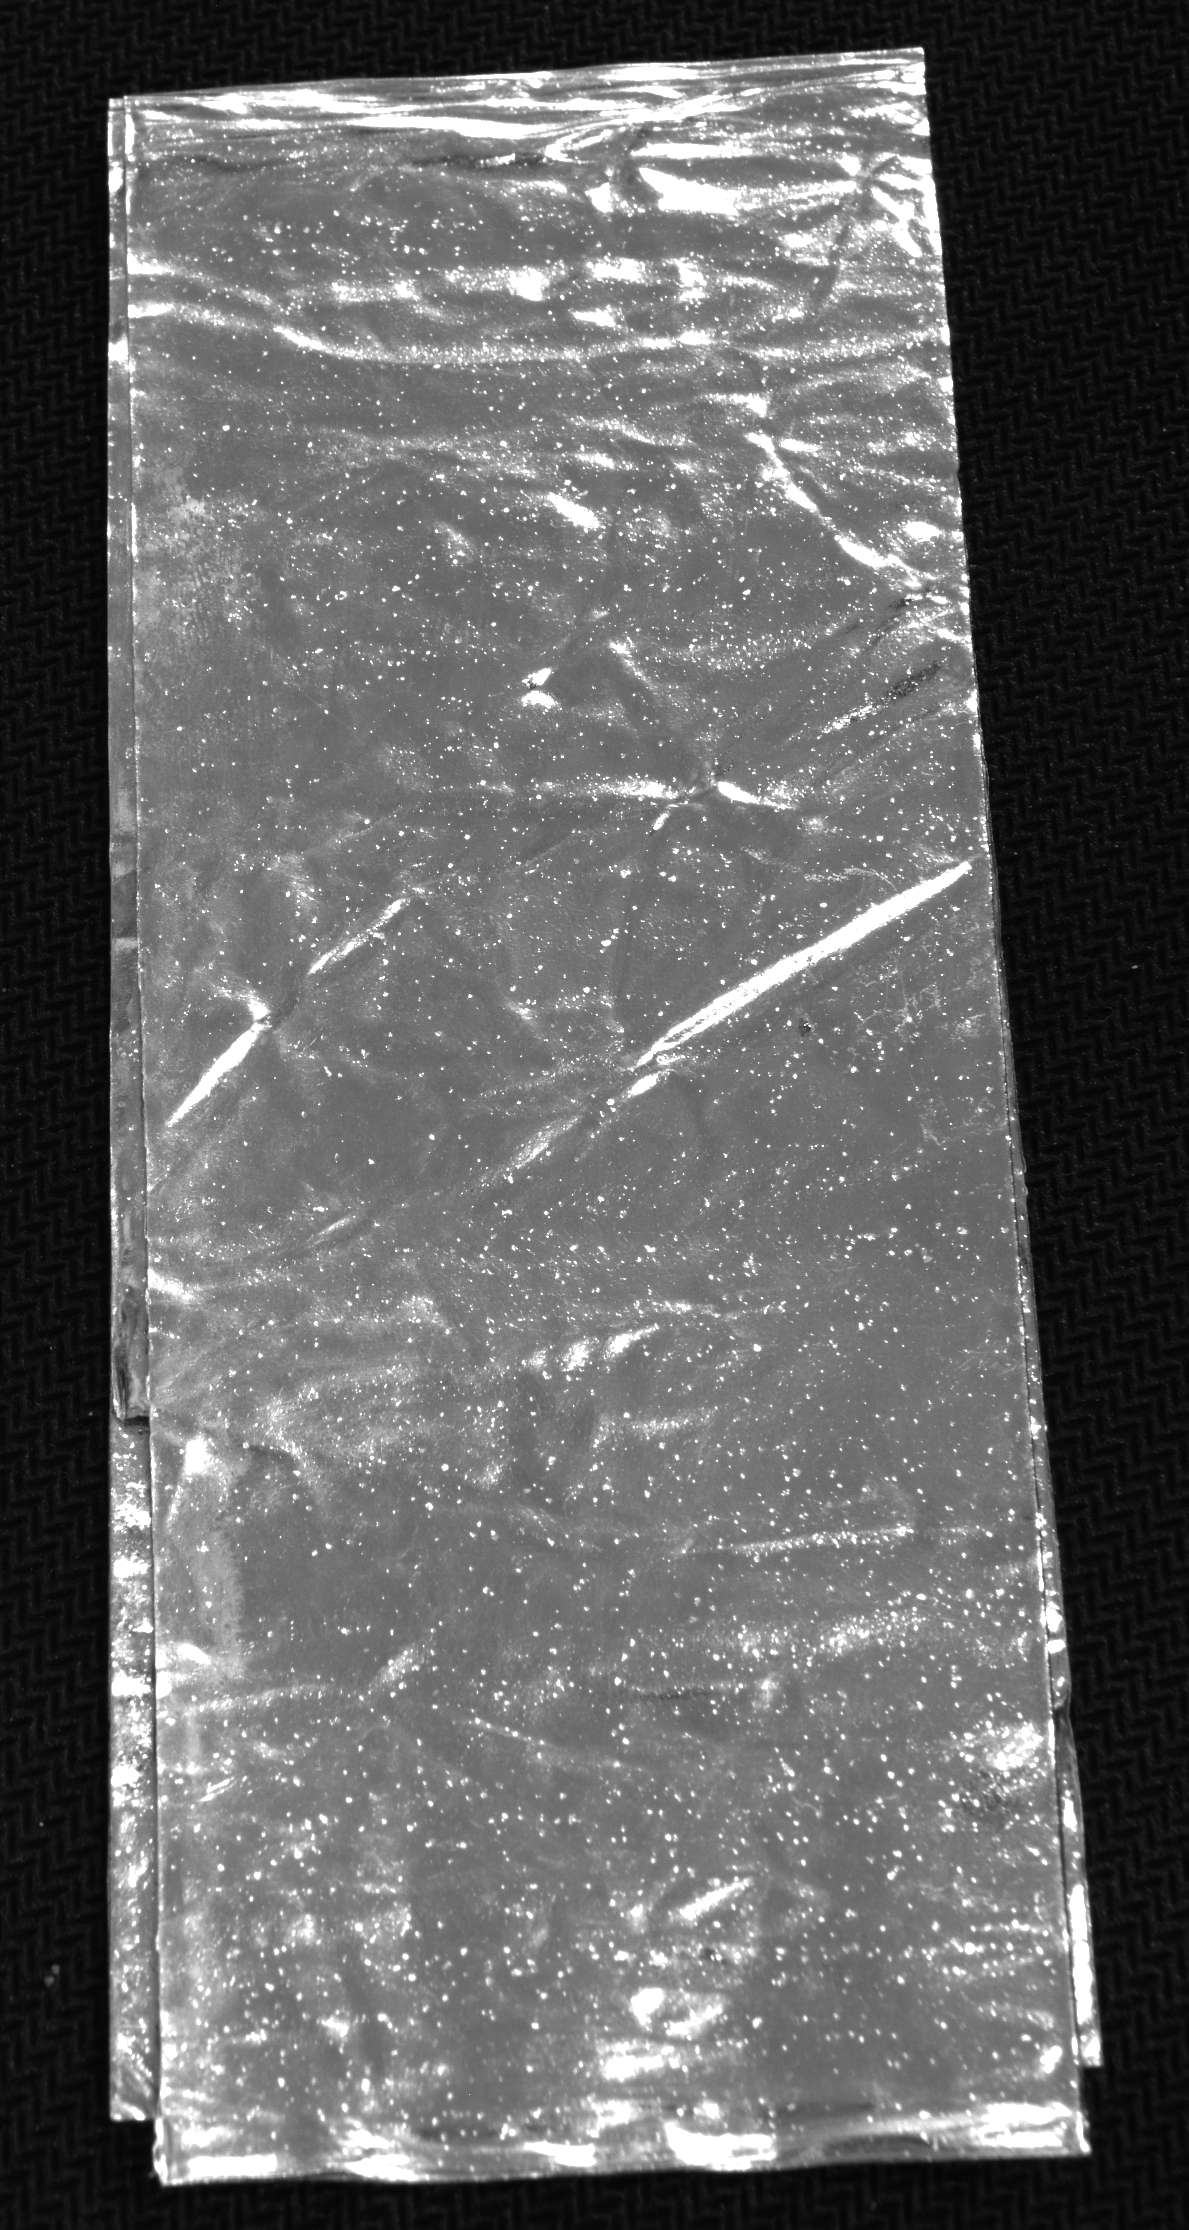

Supplement: f1 [file 2028407.f1.zip › 92-3.bmp]

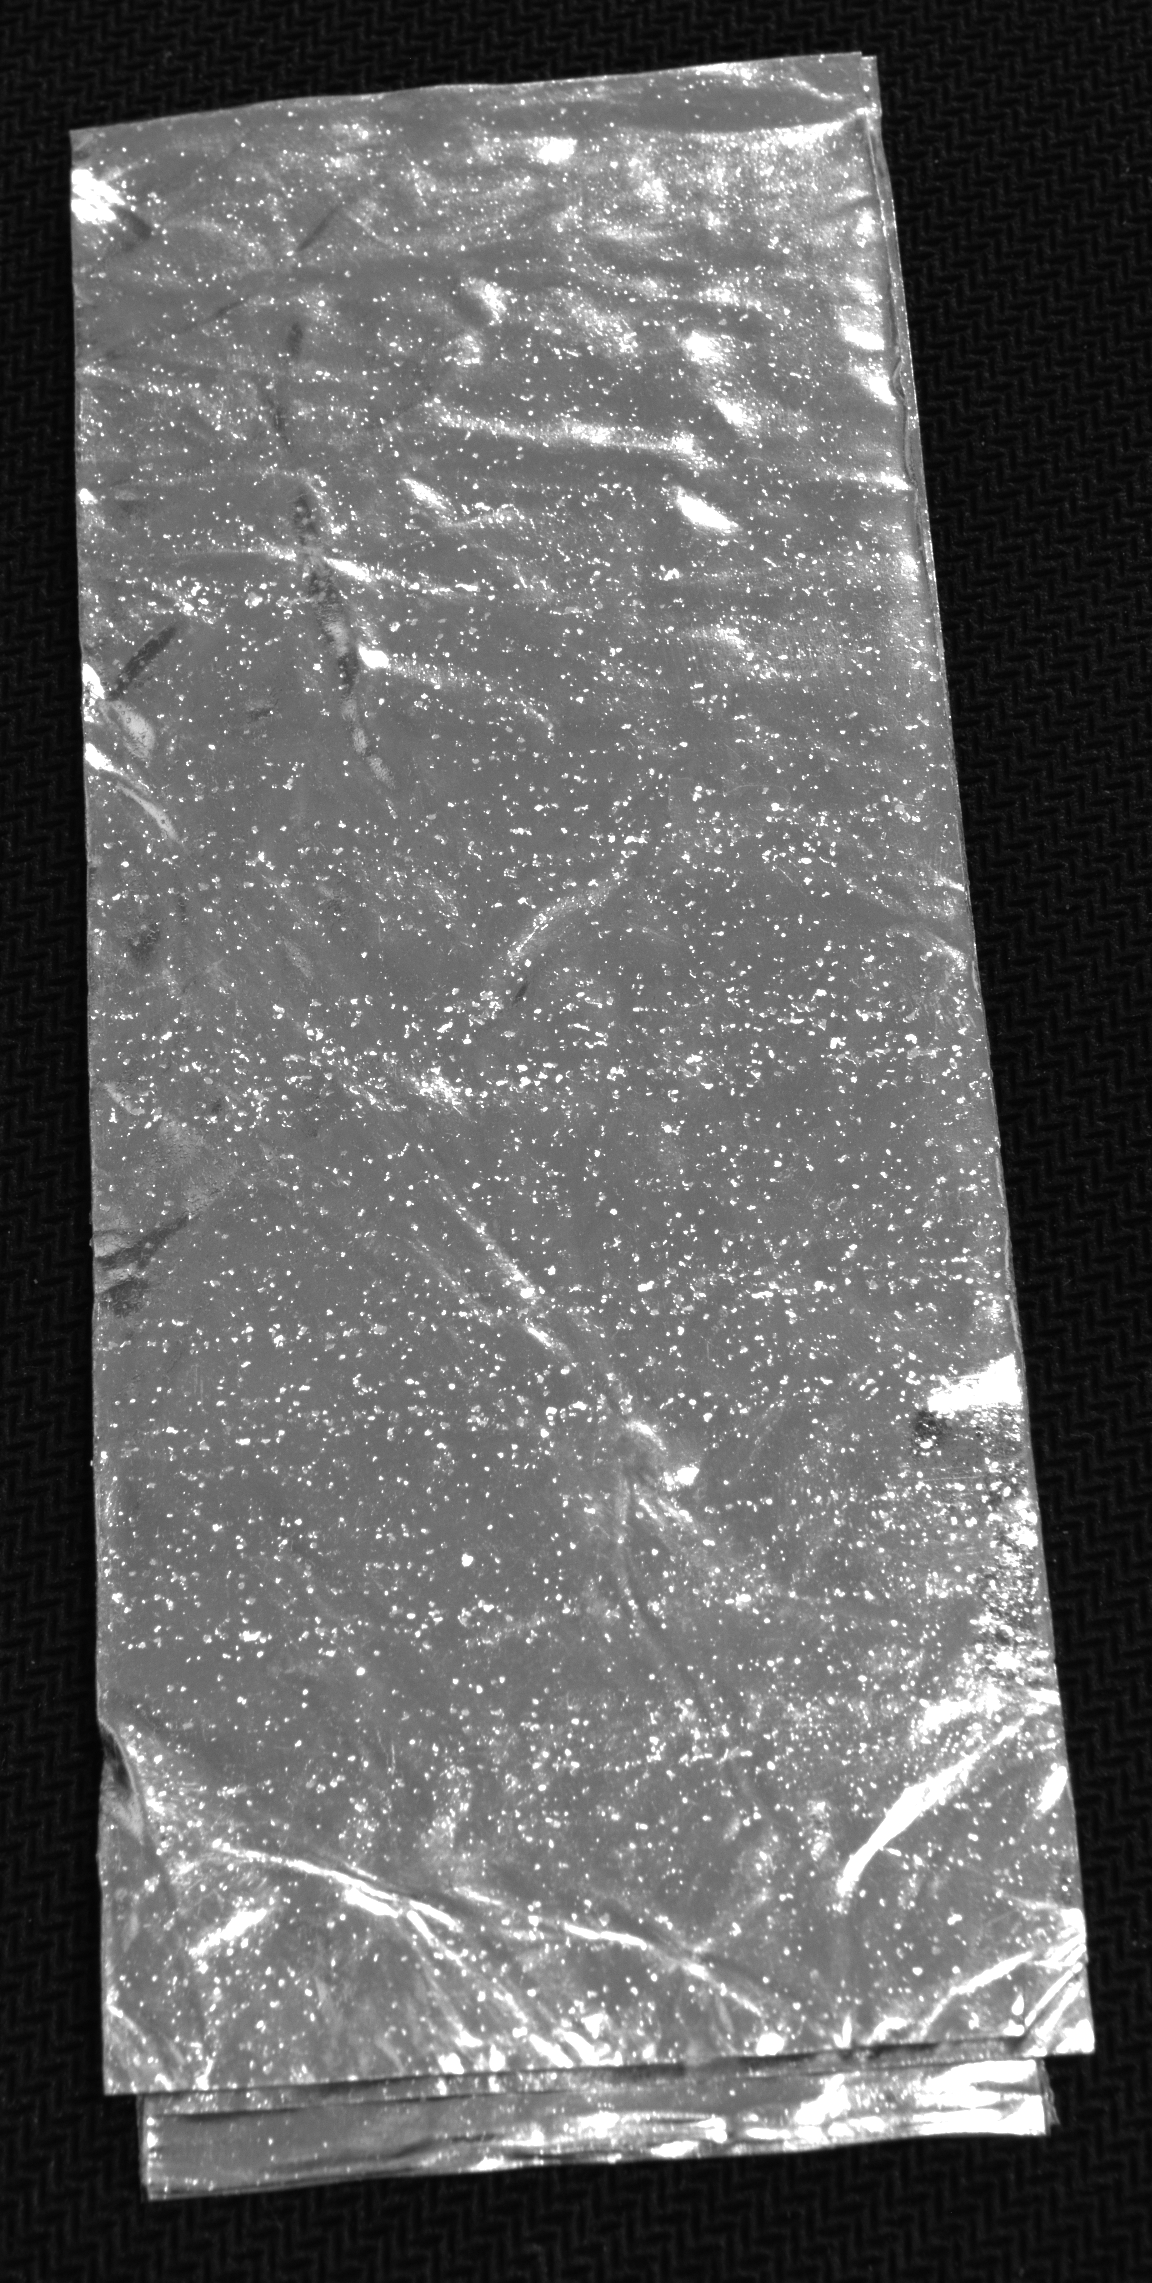

Supplement: f1 [file 2028407.f1.zip › 92-4.bmp]

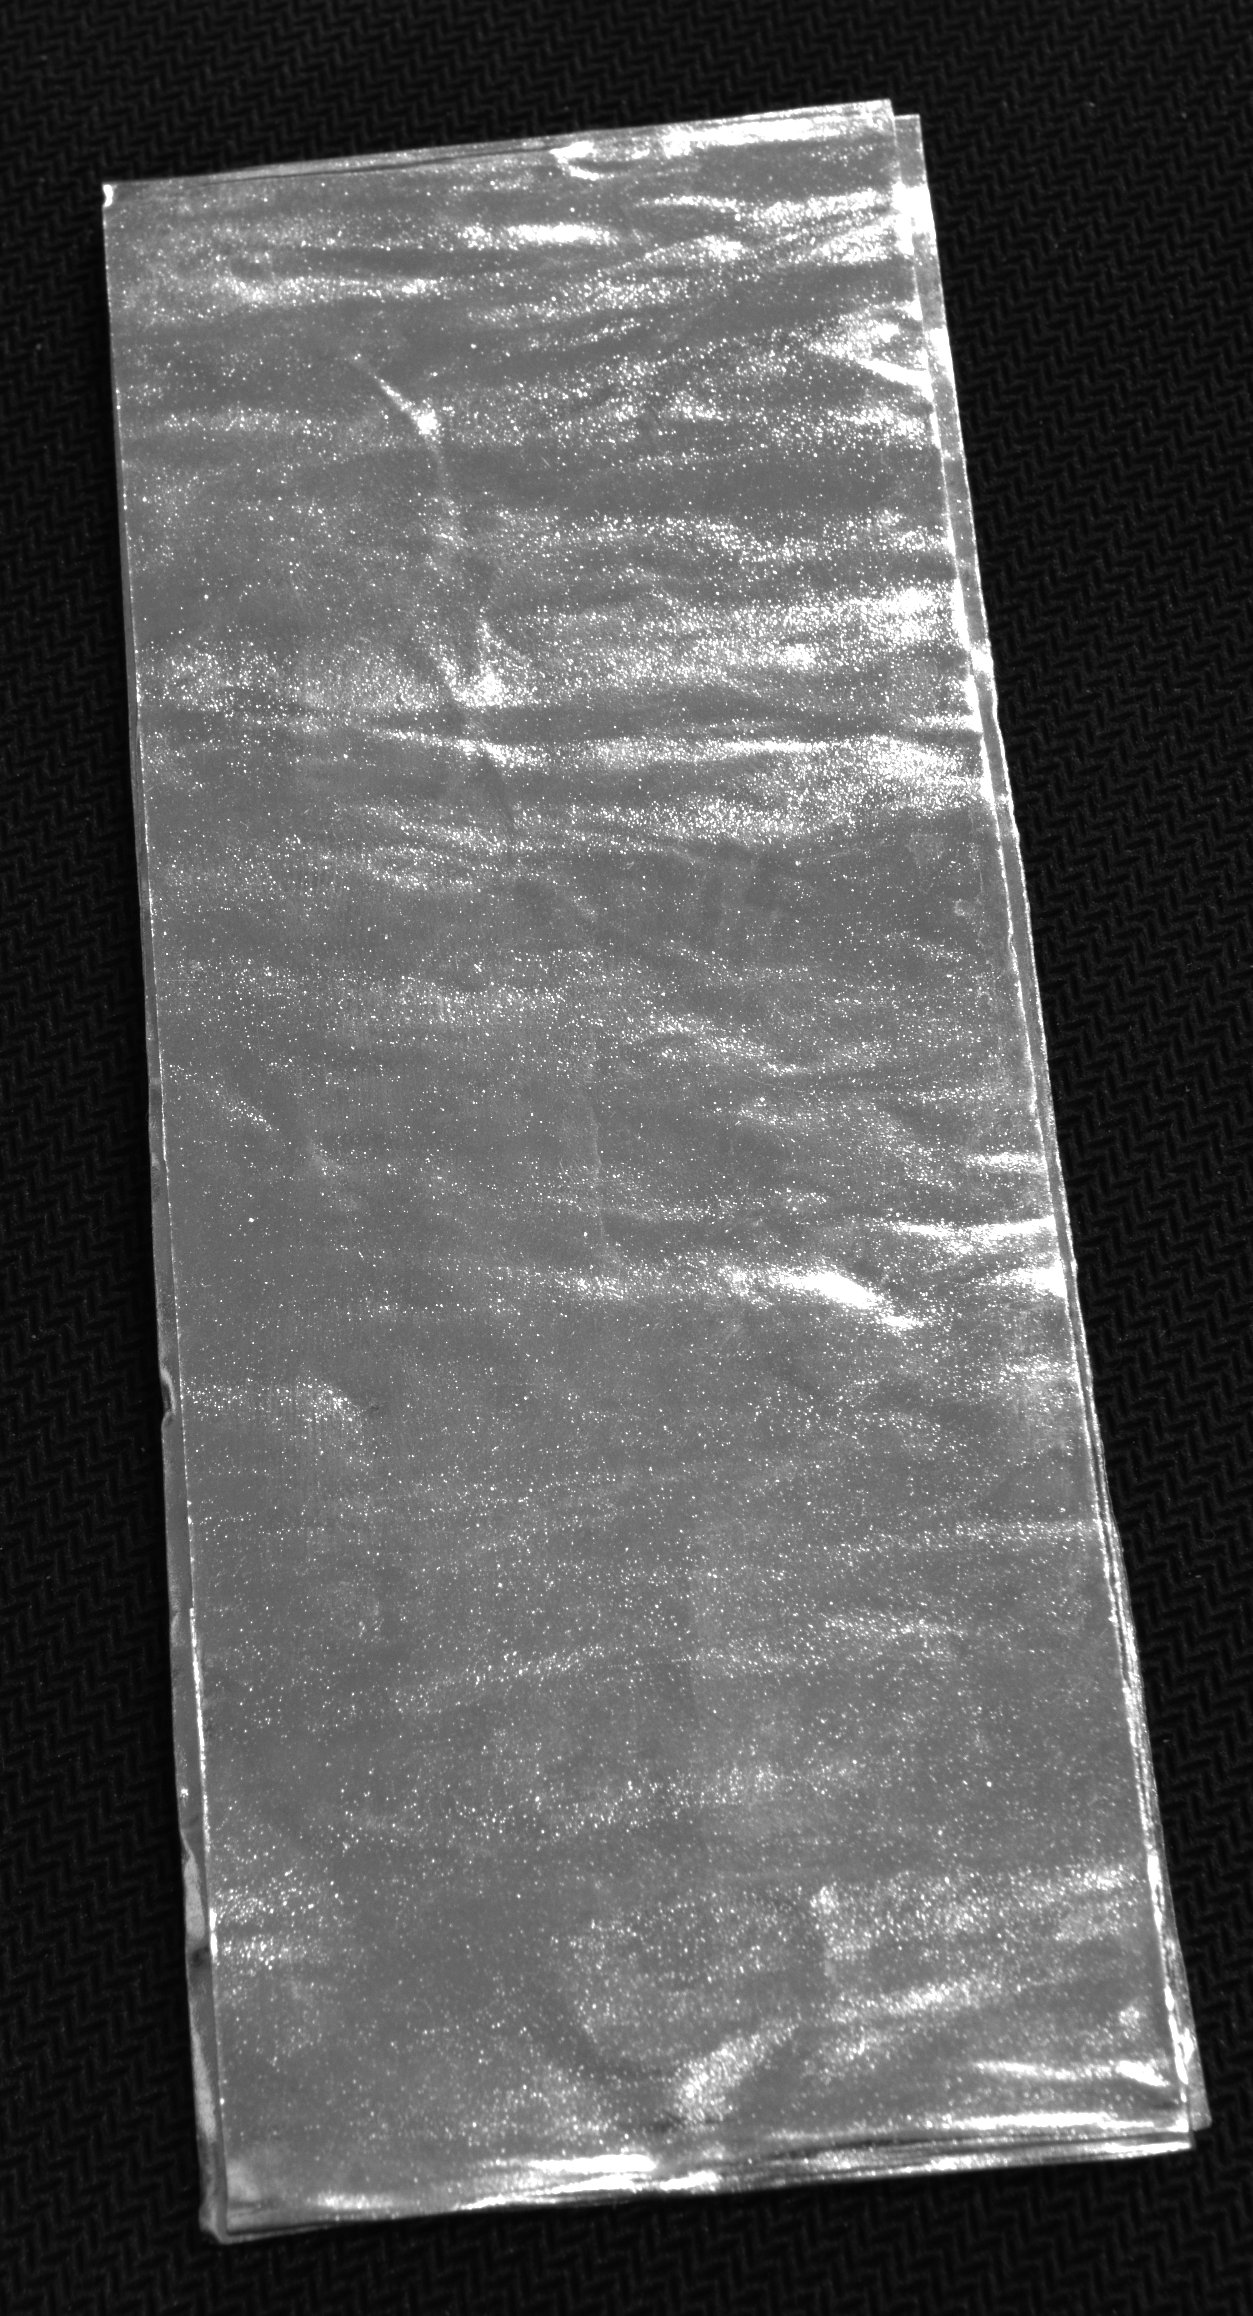

Supplement: f1 [file 2028407.f1.zip › 95-1.bmp]

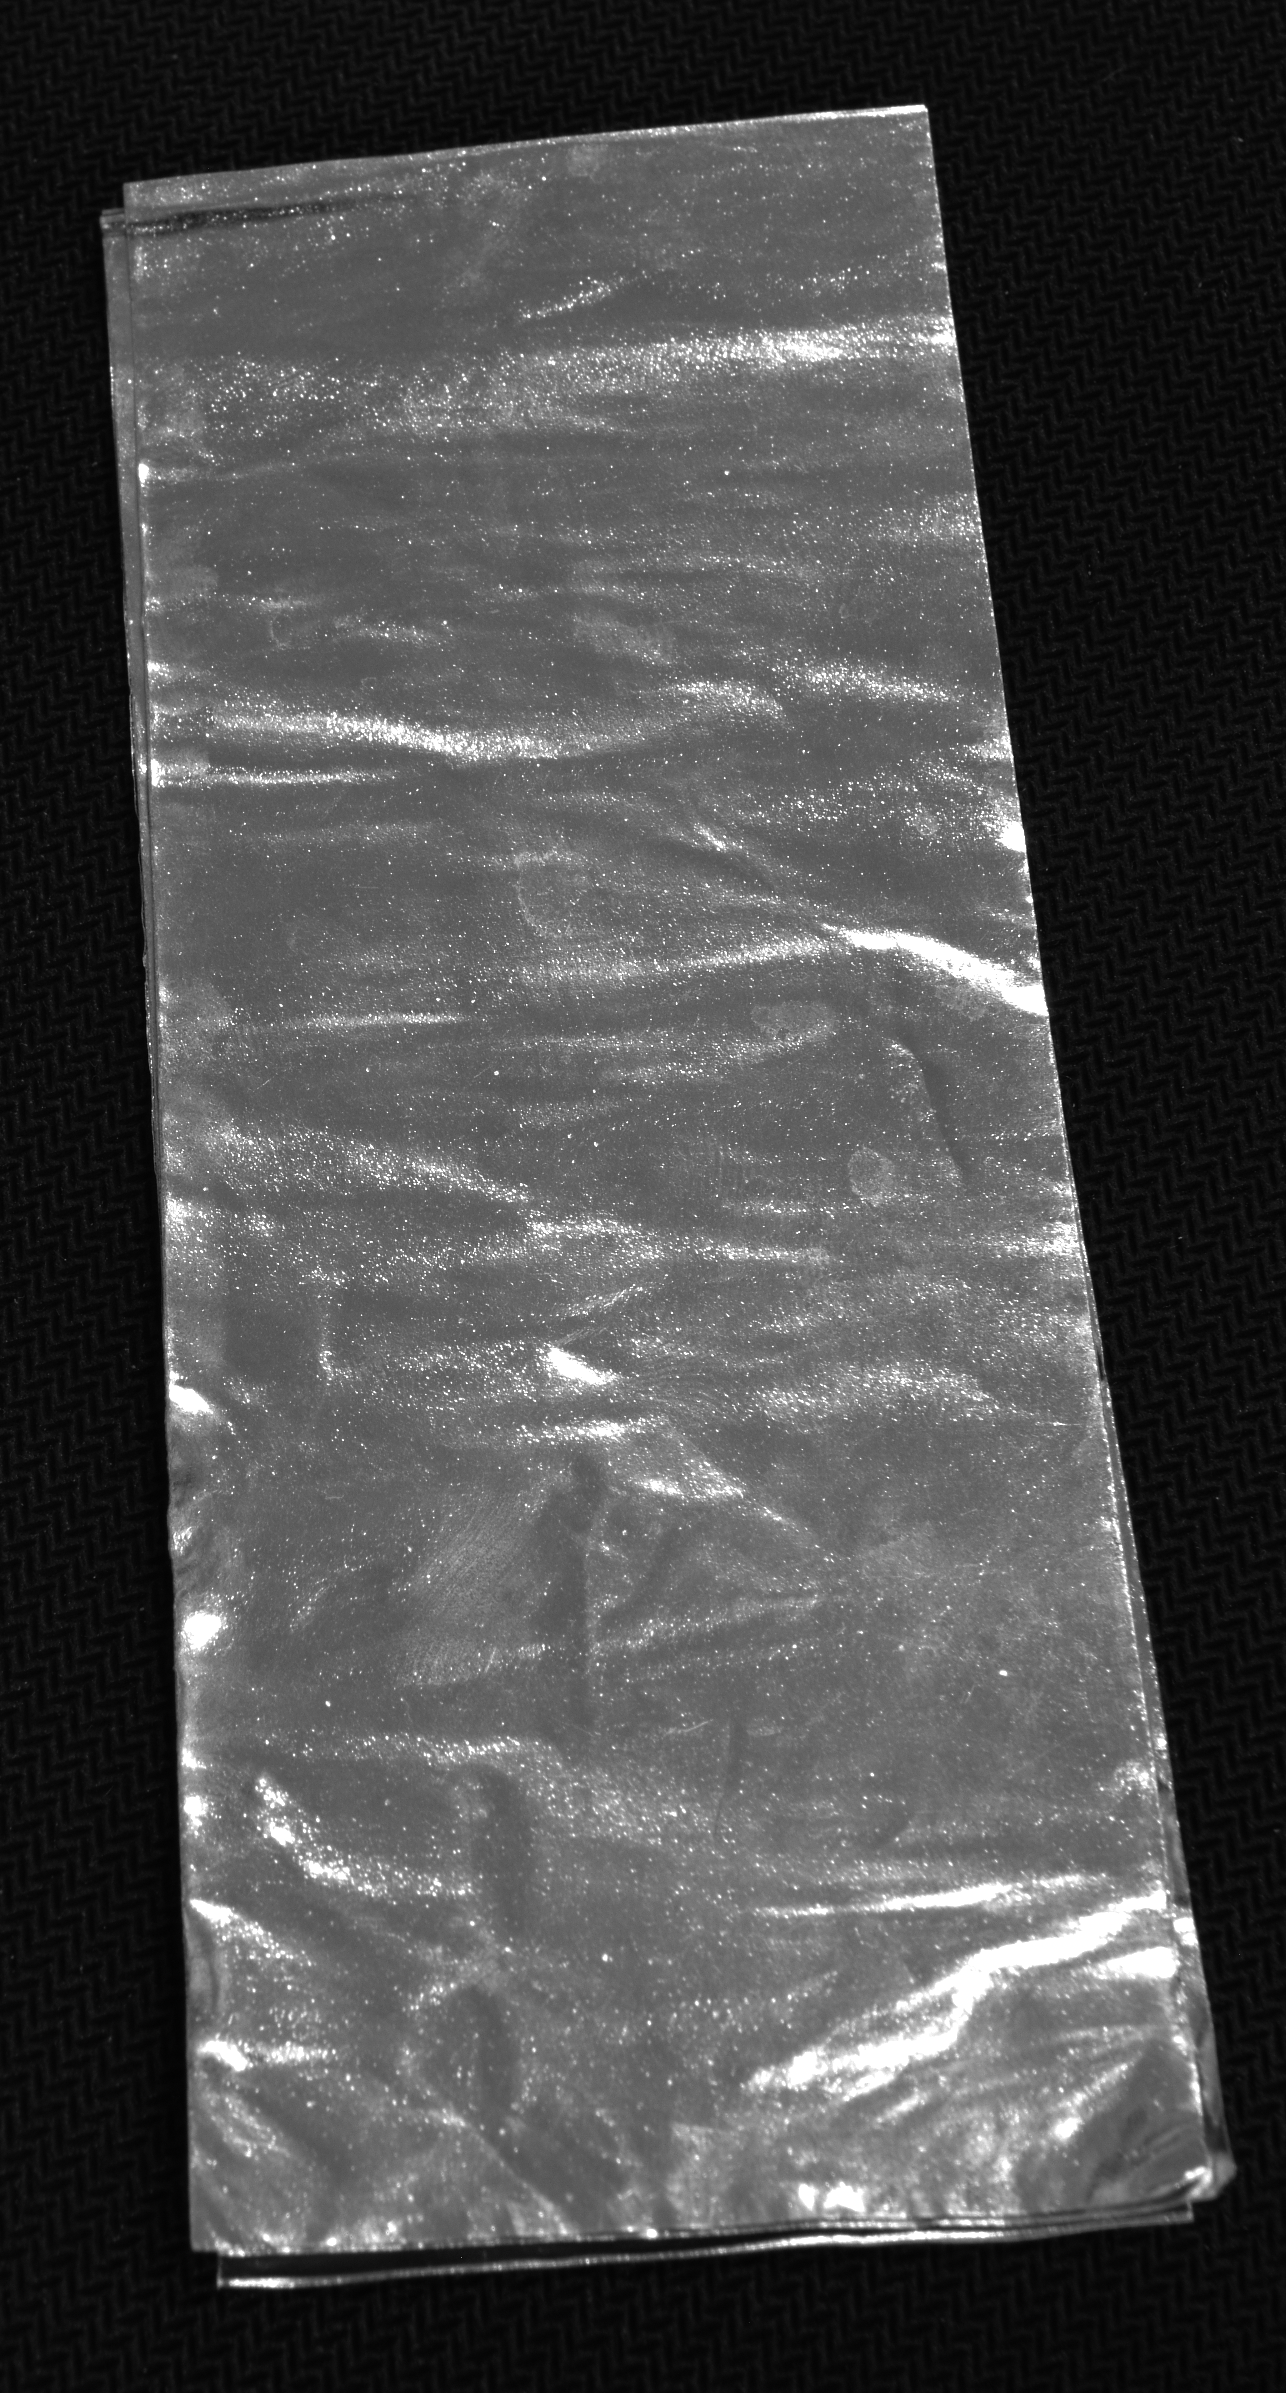

Supplement: f1 [file 2028407.f1.zip › 95-2.bmp]

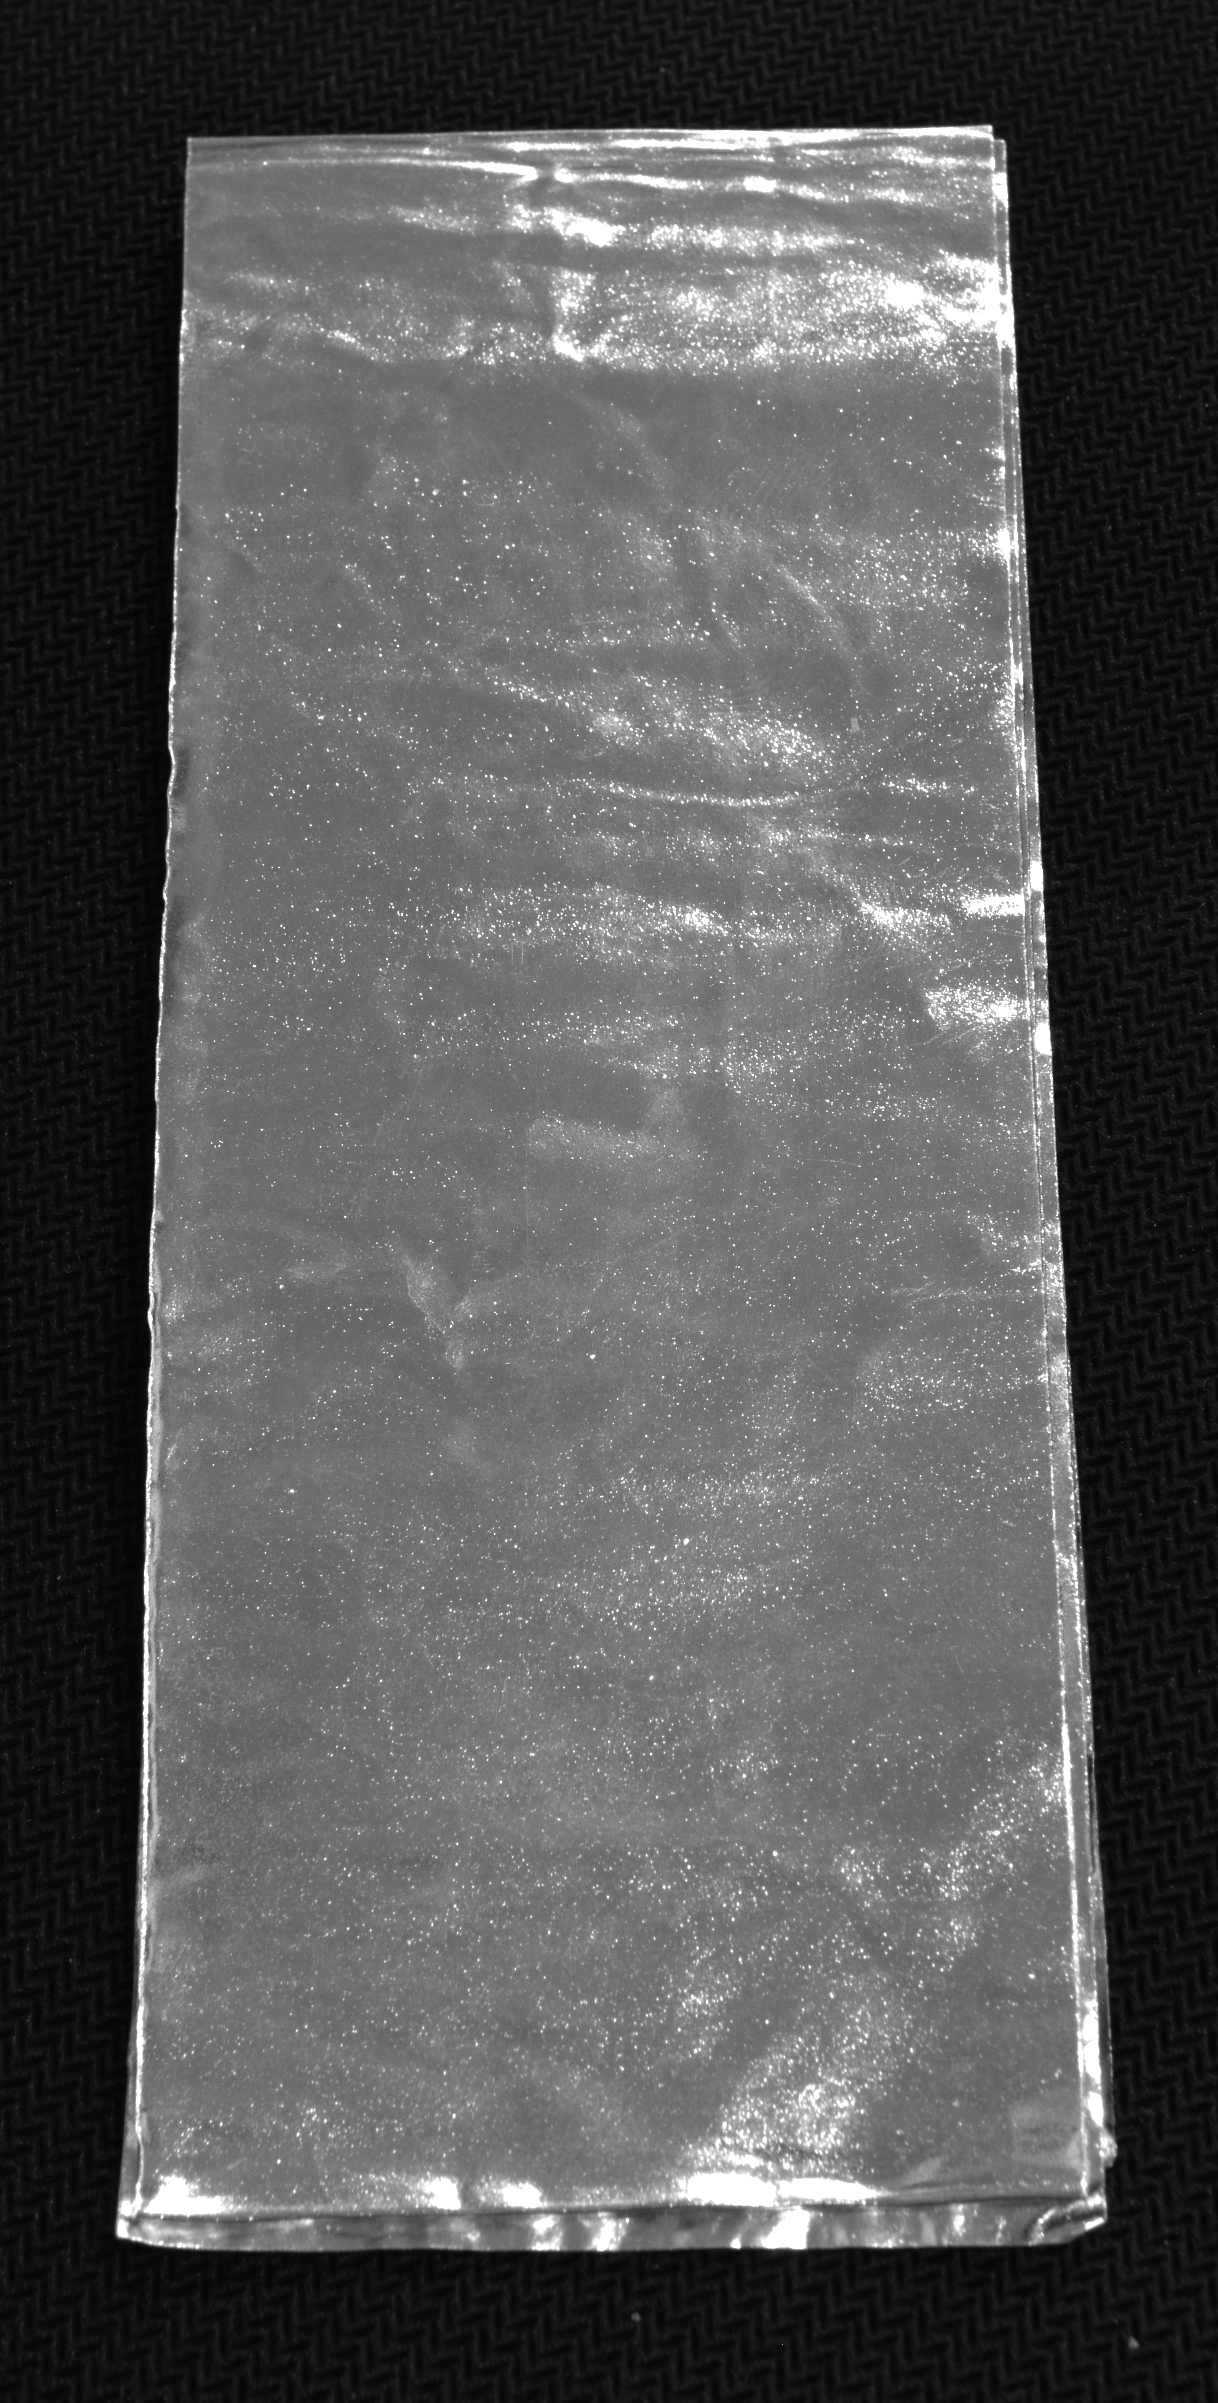

Supplement: f1 [file 2028407.f1.zip › 95-3.bmp]

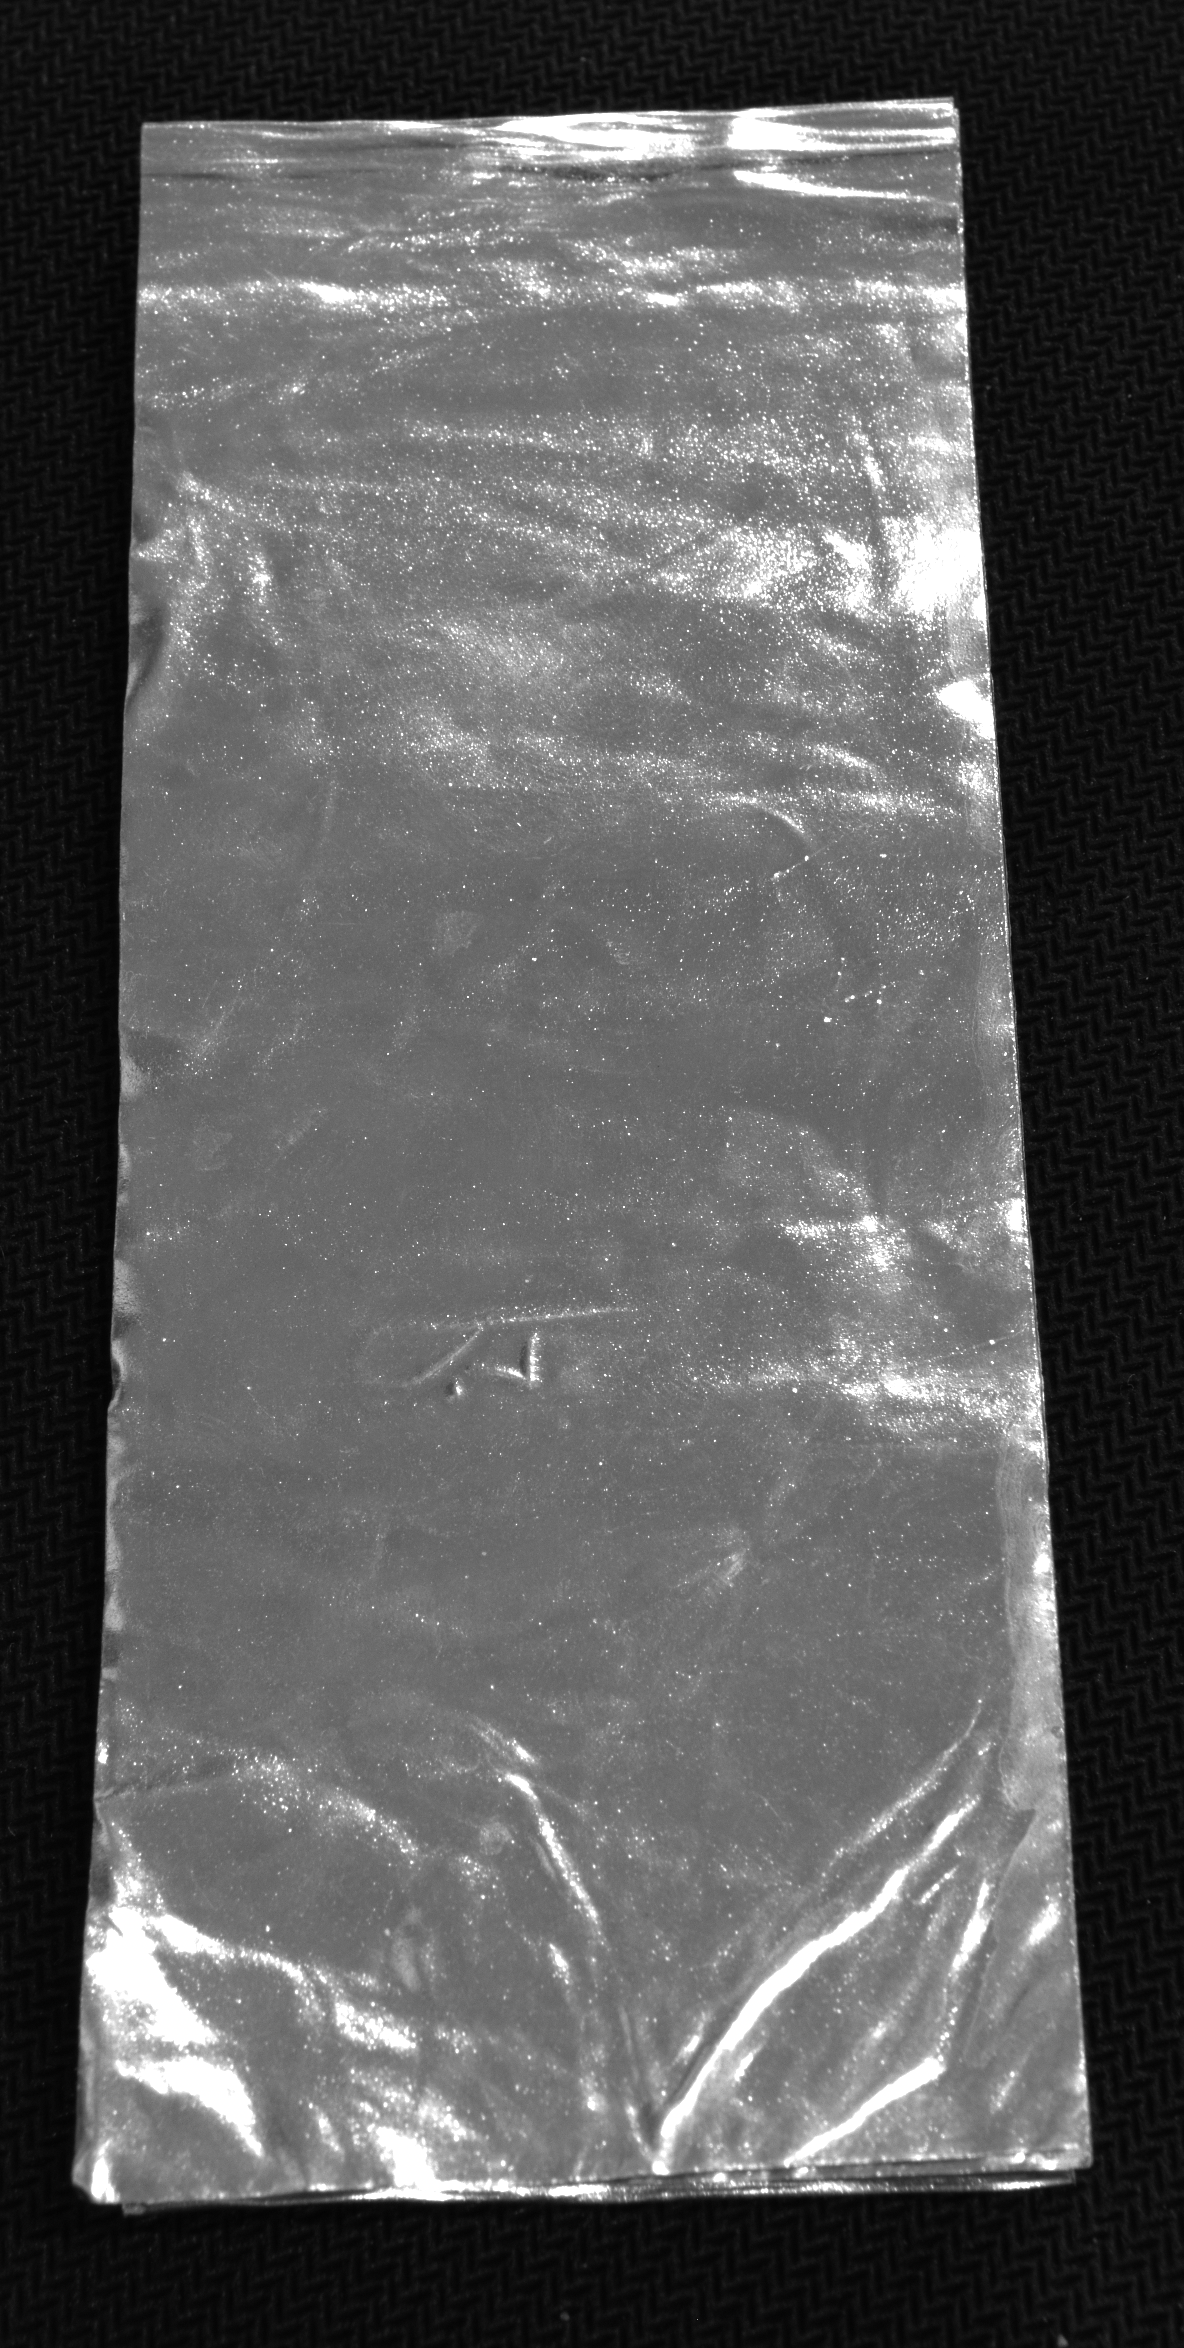

Supplement: f1 [file 2028407.f1.zip › 95-4.bmp]

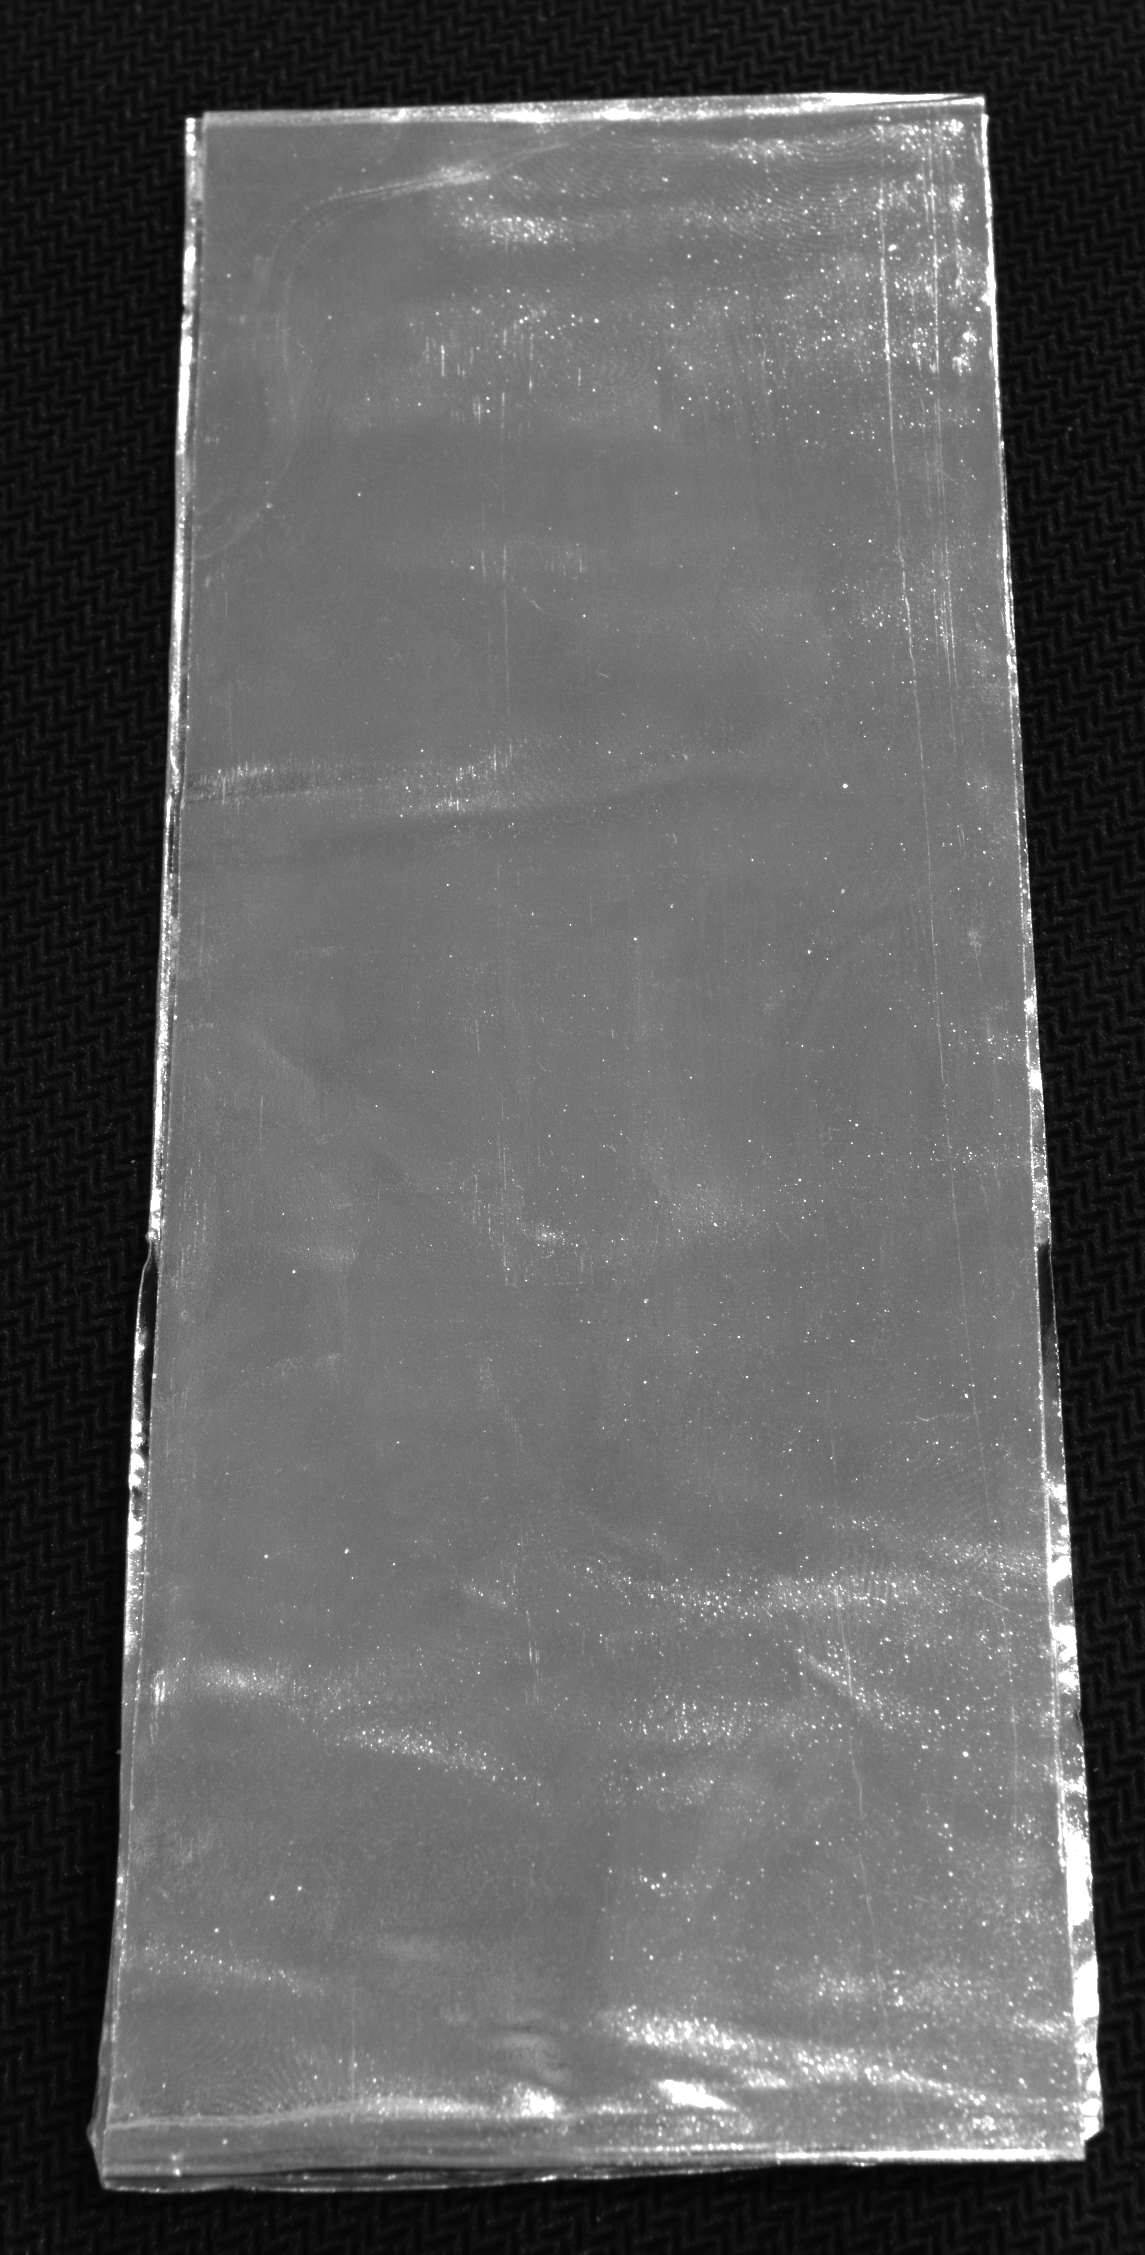

Supplement: f1 [file 2028407.f1.zip › 97-1.bmp]

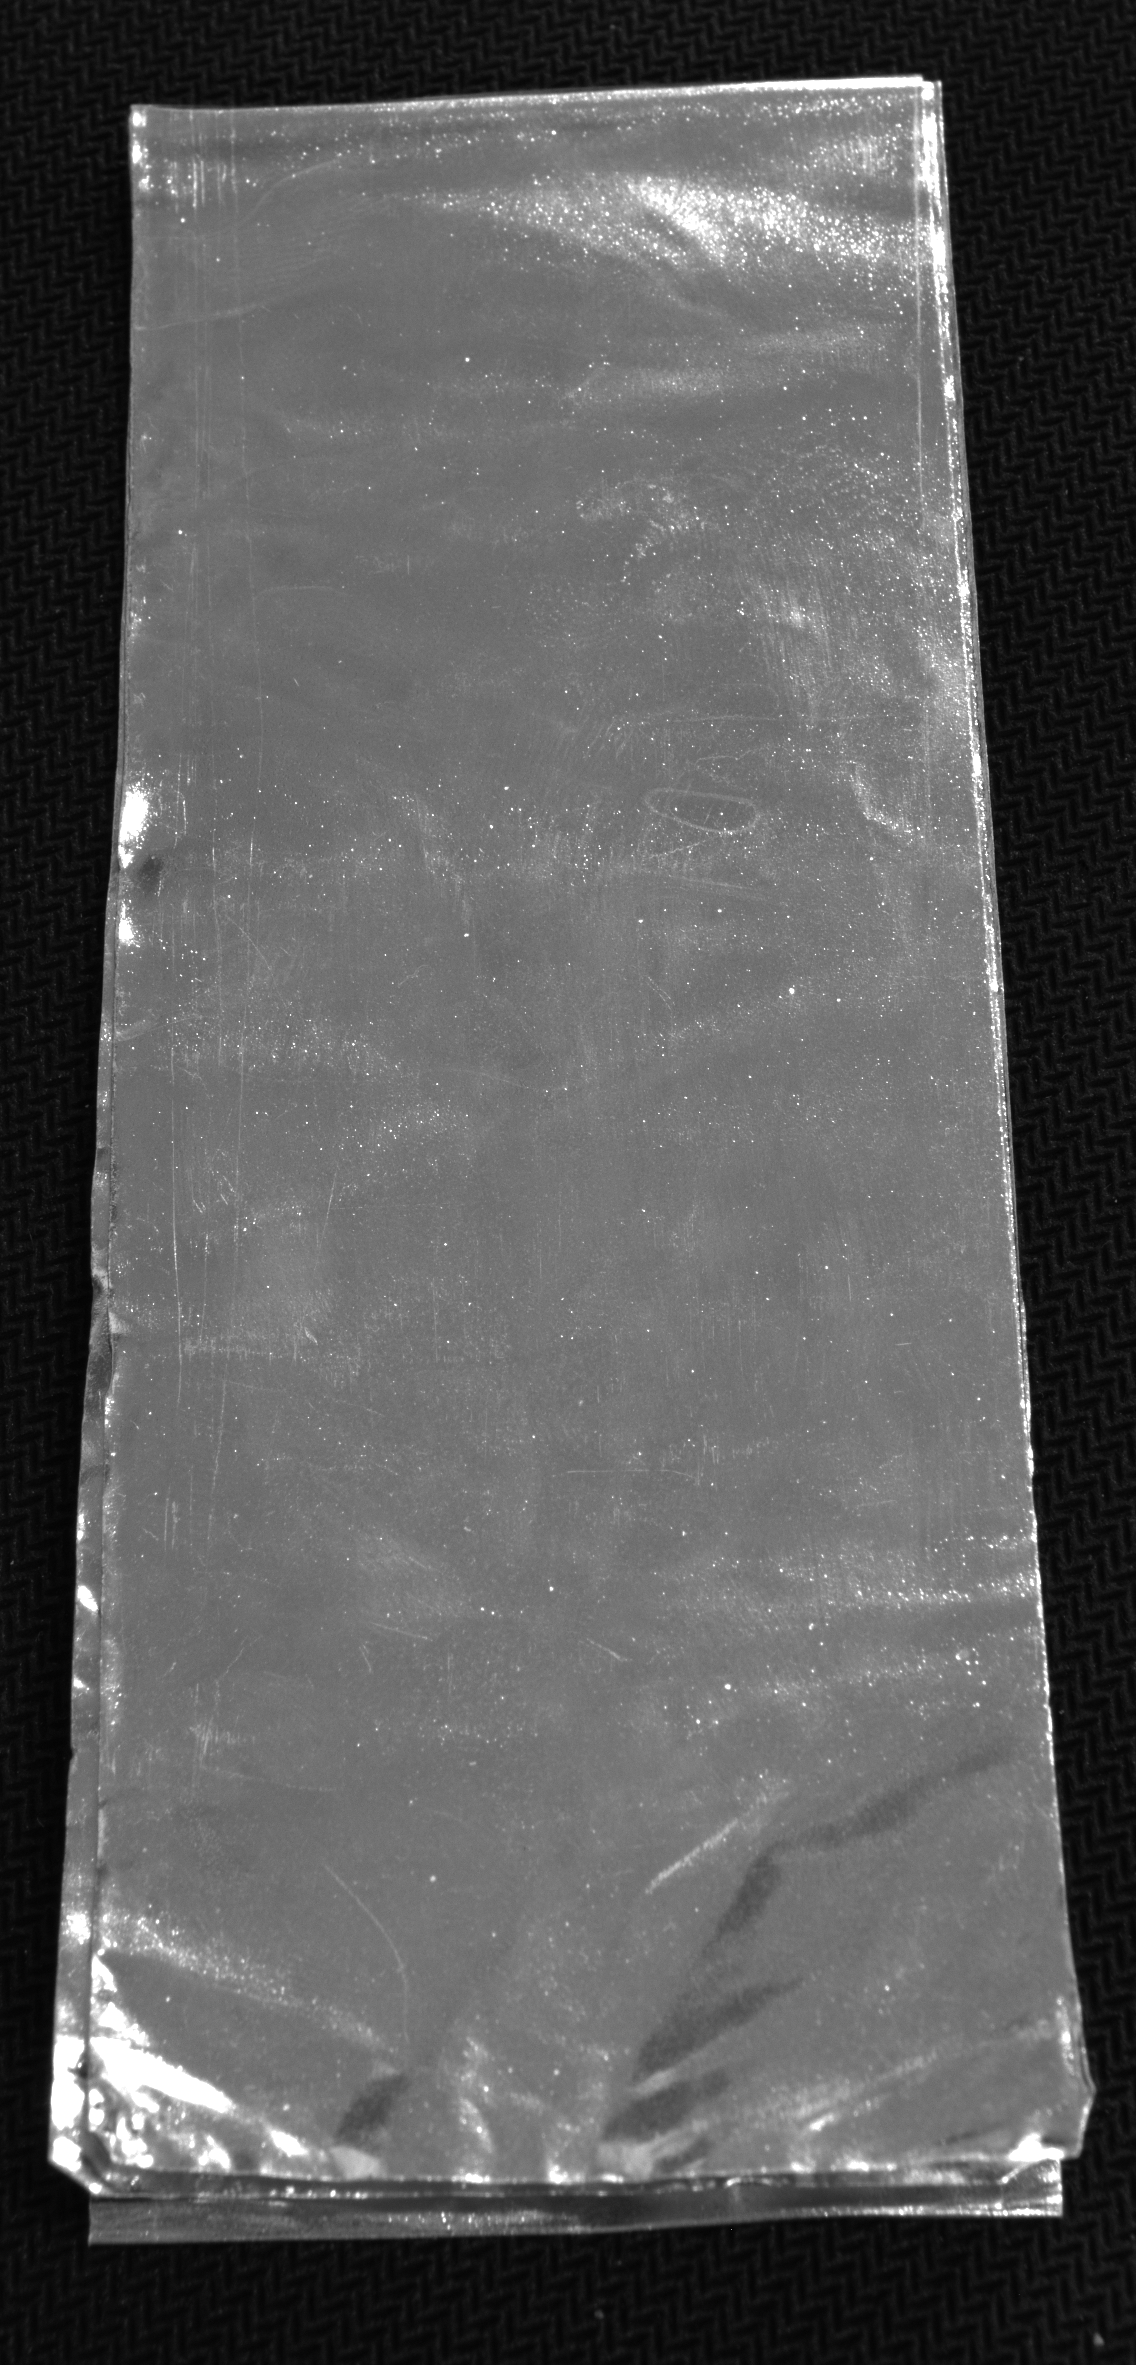

Supplement: f1 [file 2028407.f1.zip › 97-2.bmp]

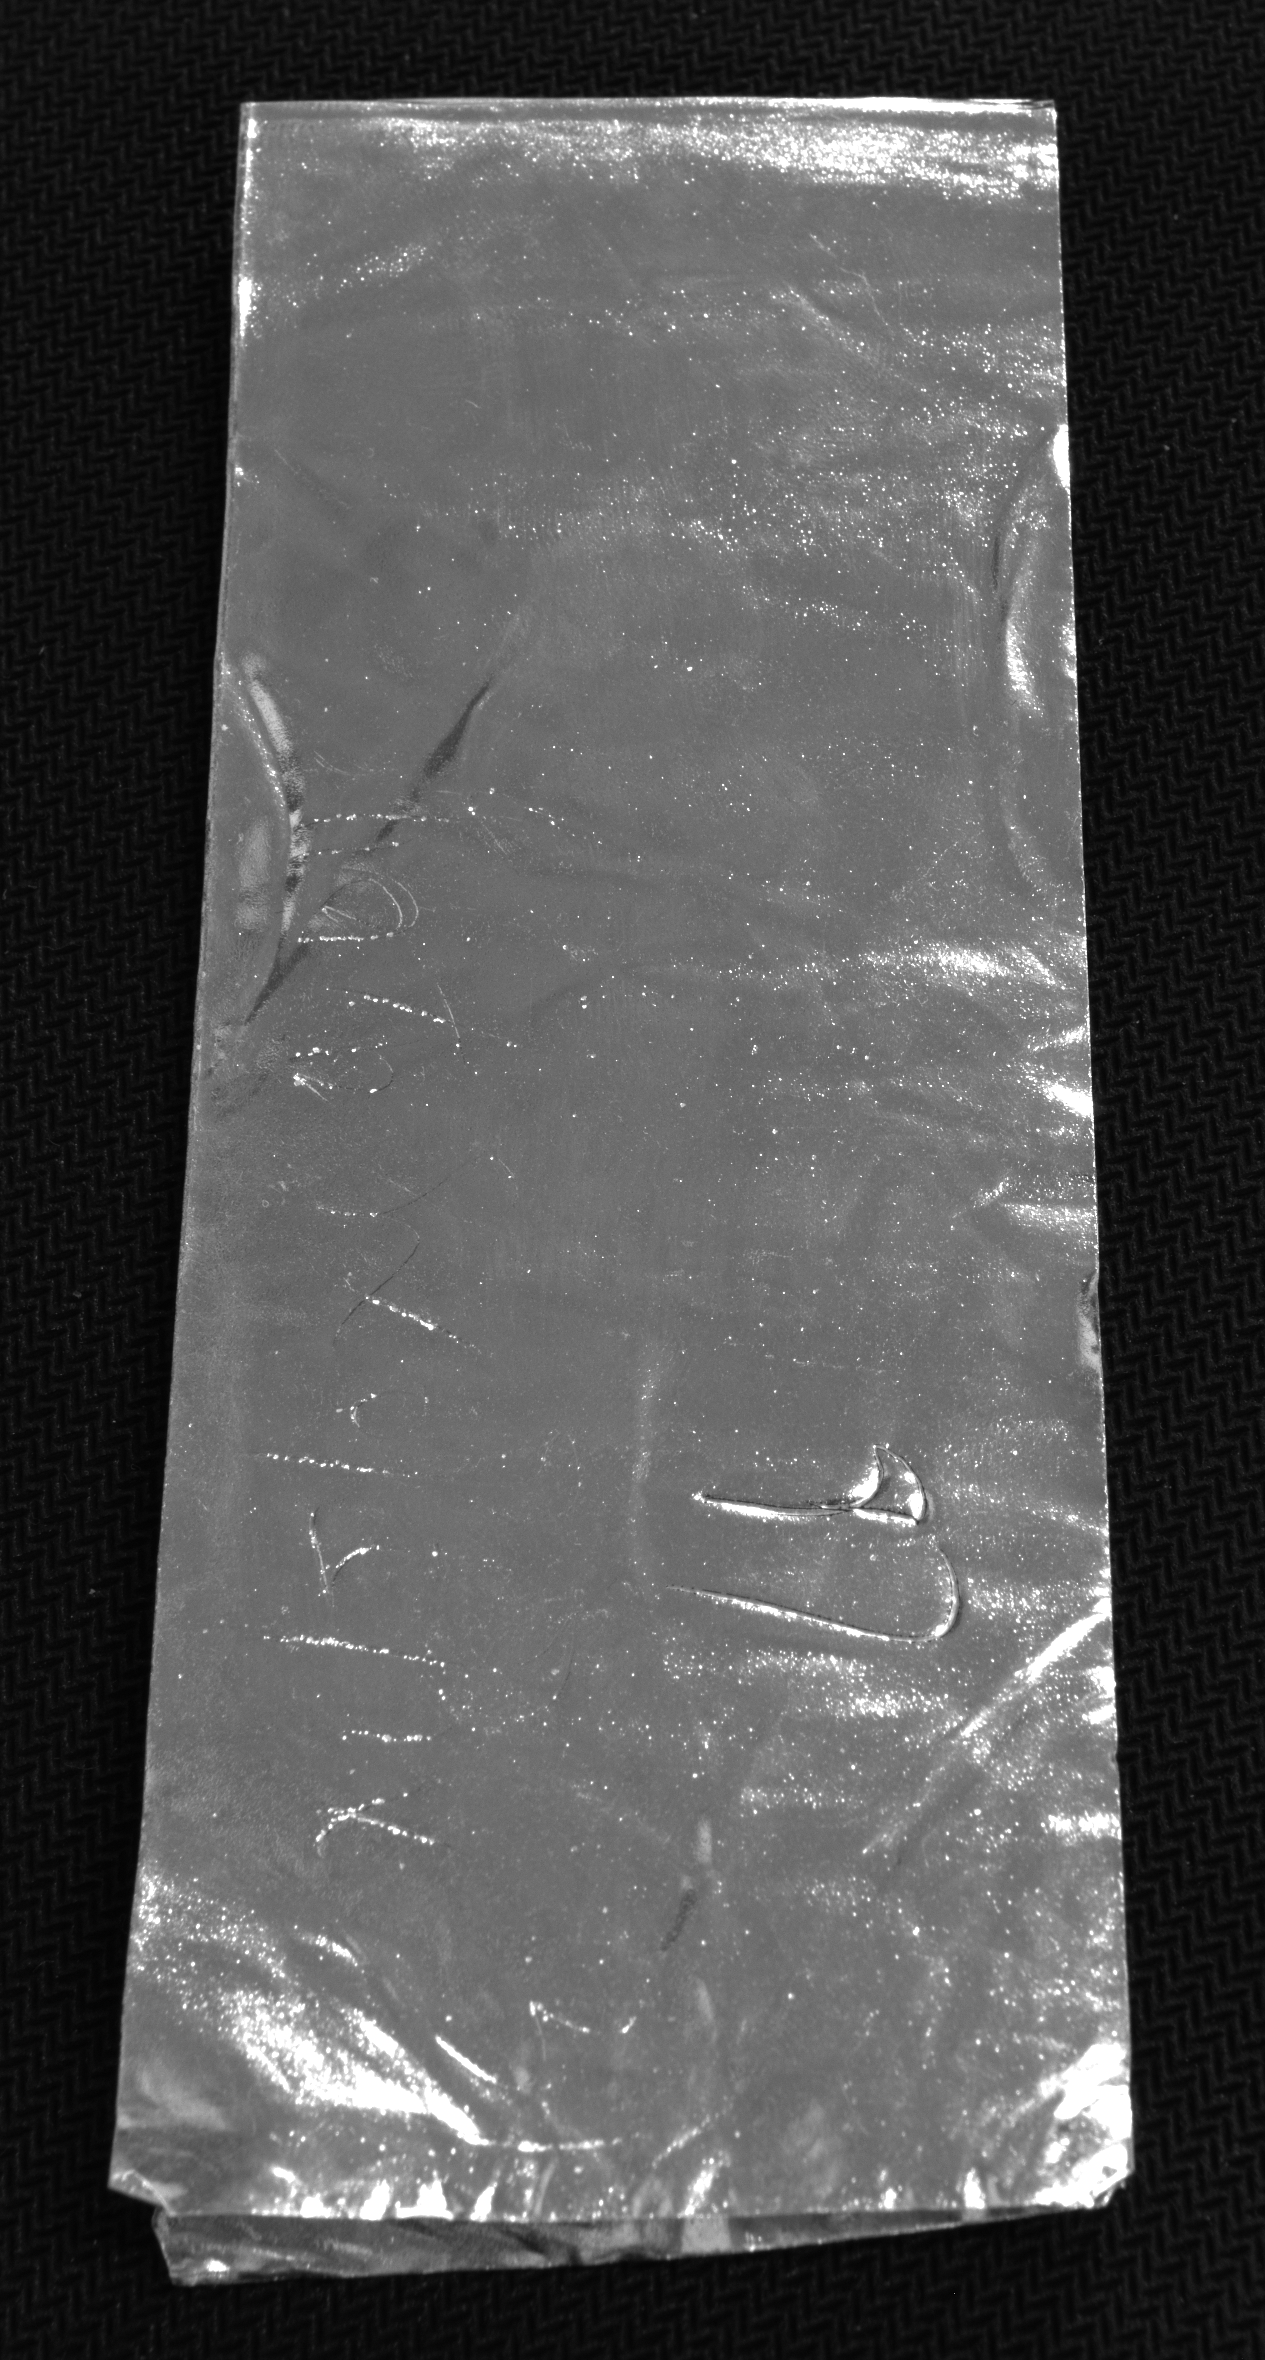

Supplement: f1 [file 2028407.f1.zip › 97-3.bmp]

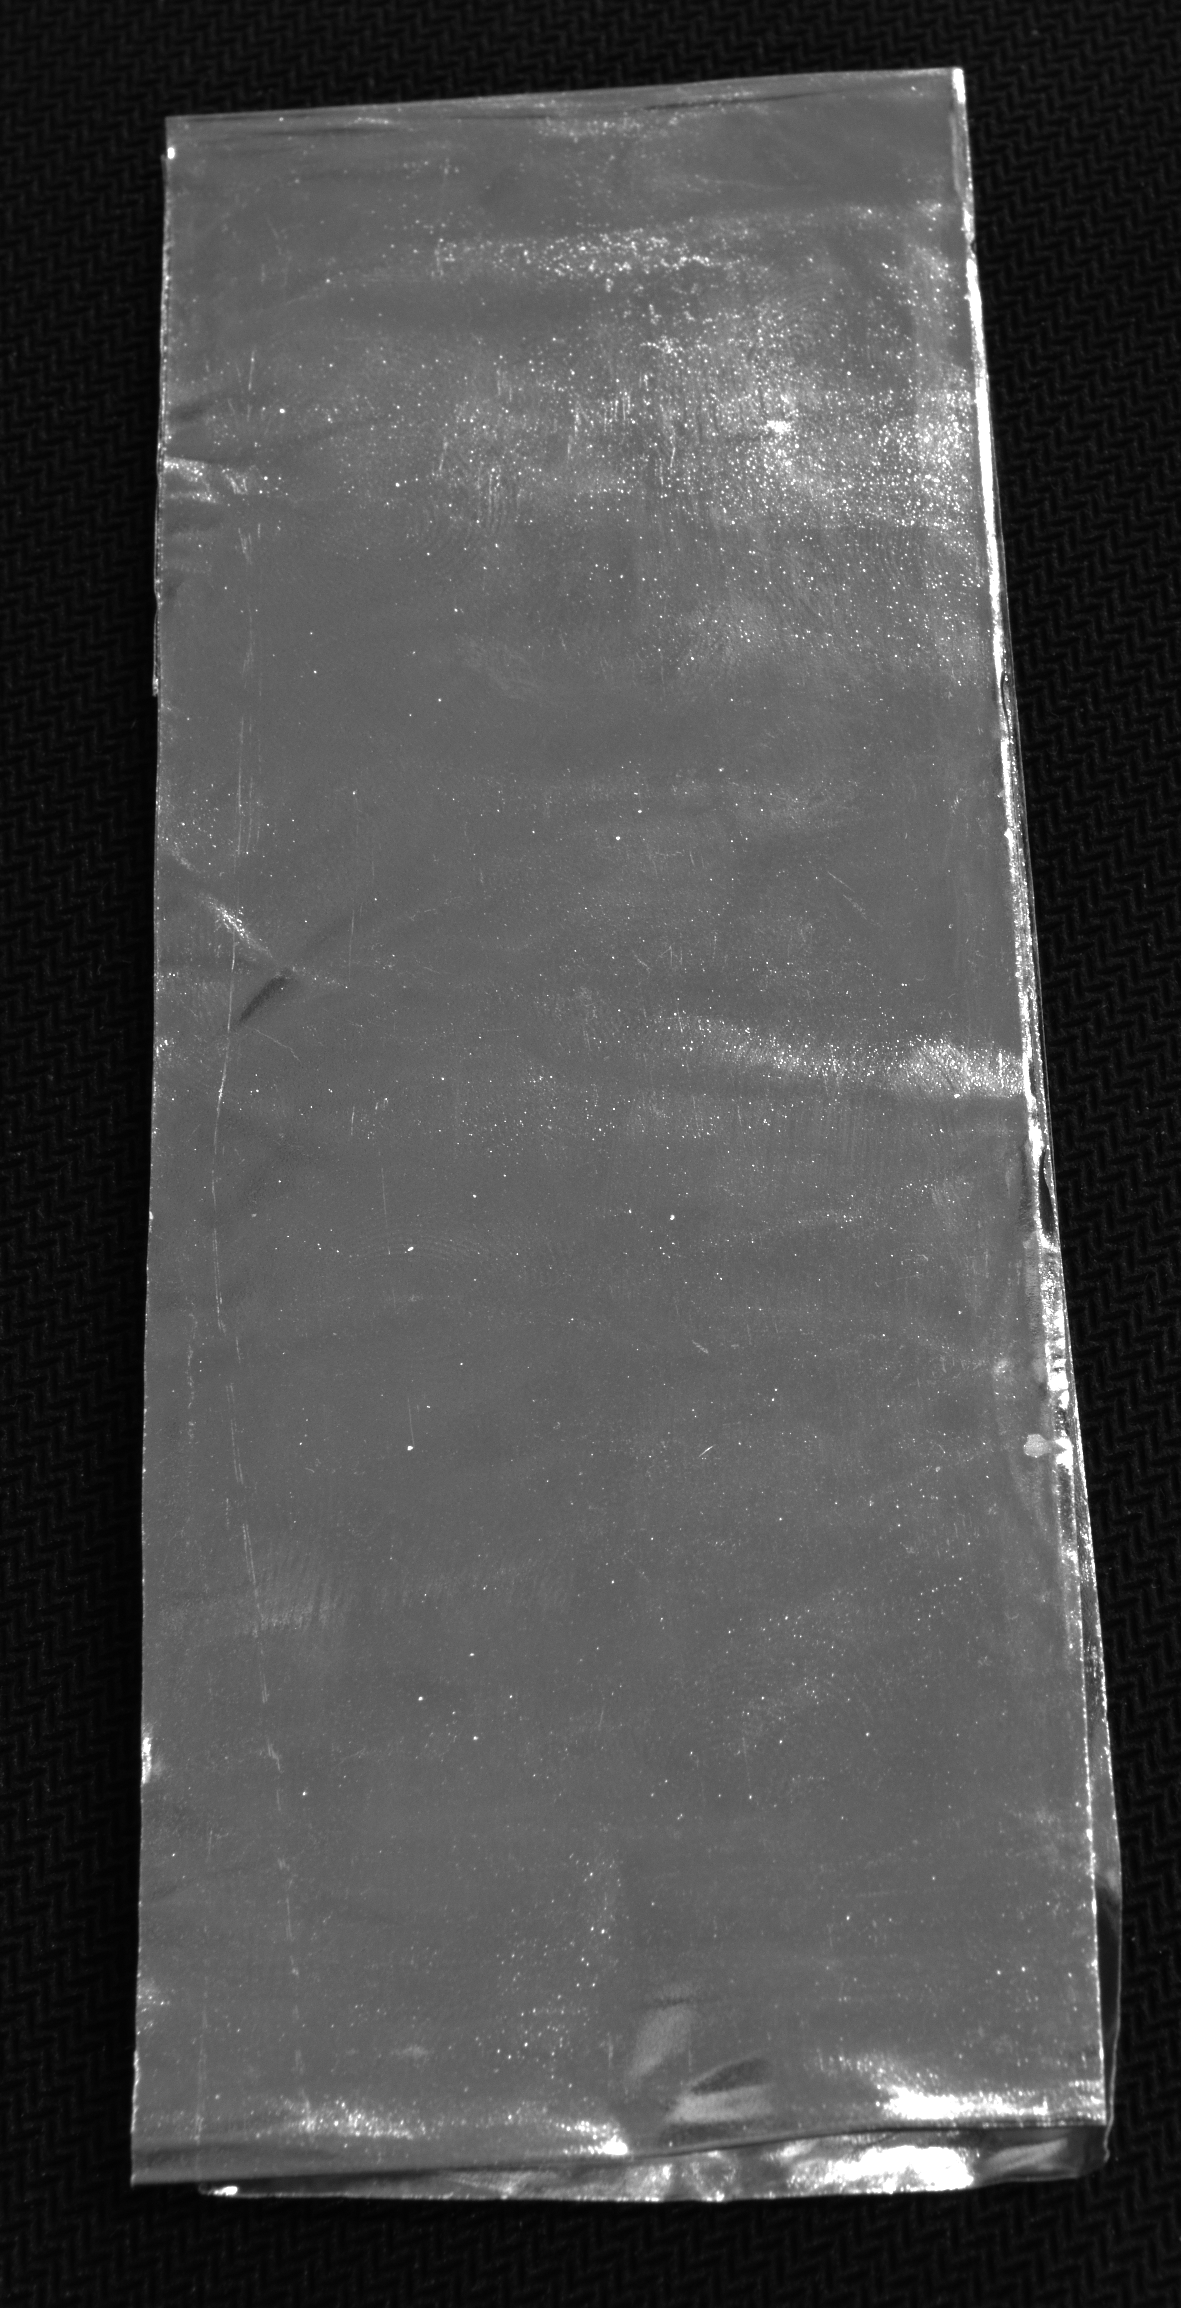

Supplement: f1 [file 2028407.f1.zip › 97-4.bmp]
